# Supplementary material for: Effects of unilateral neck muscle vibration on tilt direction and variability of subjective postural vertical in the frontal plane during seated posture in healthy adults
Source: PeerJ. 2026 Jan 7;14:e20579. doi: 10.7717/peerj.20579 (PMC12790282; doi:10.7717/peerj.20579)
Supplement: Supplemental Information 1 [file peerj-14-20579-s001.xlsx]

## Sheet: raw data_SPV 8 trials
L-Vib group
	before								tilt direction	variability			during								tilt direction	variability			after								tilt direction	variability
No	1	2	3	4	5	6	7	8	mean	sd		No	1	2	3	4	5	6	7	8	mean	sd		No	1	2	3	4	5	6	7	8	mean	sd
1	-2.2	-1.7	0.3	-4	1.9	0.7	-0.8	3	-0.35	2.13834		1	1	-0.2	2.4	-0.8	0.2	0.6	-1.1	0.3	0.3	1.02591		1	-2.3	-1.4	-0.8	-1.4	-0.4	0.6	0.4	1.7	-0.45	1.2145
2	2.8	0.3	0.1	1.7	-4.2	-2.8	-2	-3.2	-0.9125	2.34224		2	-0.6	-0.6	0.1	-1	-0.3	-2.4	-1.6	-0.1	-0.8125	0.780124		2	0.9	-0.8	1.7	-1.2	-1.5	-1.5	-1.2	-1.9	-0.6875	1.2015
3	-0.5	-7	-7.9	-2.2	-1.4	0.7	0.8	2.8	-1.8375	3.54293		3	0.5	-3.1	-4.6	-3.5	-0.8	0	-0.5	2.8	-1.15	2.27541		3	-0.2	-1	-1.2	-2.1	0.2	-0.3	0.2	1.7	-0.3375	1.06294
4	-4.2	6.2	6.1	-1.1	0.1	-5.9	-5.7	1	-0.4375	4.48997		4	-1.6	3.5	2	-0.3	1.6	1.1	-3.9	-1.1	0.1625	2.20451		4	0.6	3.1	4.8	-0.5	-1	-6.2	-5.7	-2.5	-0.925	3.61585
5	4.5	-0.2	-0.6	4.7	0.1	1.4	1.3	2.8	1.75	1.92808		5	1.1	0.1	1.1	2.5	-1.4	-0.2	0.8	-1	0.375	1.18295		5	1.2	0.7	-0.3	3.1	-1.5	-0.1	0.4	1.1	0.575	1.25574
6	-4.8	-1	-1.2	-5.8	2.8	-2.6	-2.7	2.2	-1.6375	2.83722		6	-3.3	-1.1	-1.6	-1.1	0	-1.4	-0.7	-0.8	-1.25	0.89861		6	-2.3	-1.6	0	-1.5	0.2	-0.6	-1.4	1.1	-0.7625	1.06176
7	3.3	1.1	-1.3	1.5	-4.3	1.3	3.2	-2.8	0.25	2.59326		7	3.9	-0.8	1	2.7	-1.3	-0.8	0.3	-2.9	0.2625	2.07421		7	2.7	2	4.1	1.4	-2.4	-2.4	-0.9	-1.6	0.3625	2.34251
8	5.8	-8.7	-9.8	4.6	-5.4	7	7.3	-3	-0.275	6.76734		8	-4.8	1.1	4.6	-5.6	3.7	1	-1.9	4.8	0.3625	3.82522		8	-6	2.1	2.2	-4.2	6.1	0	-4.7	6.7	0.275	4.56173
9	-4.3	6.3	6.3	-2.7	3.4	-4.3	-6	2.3	0.125	4.69541		9	-2.1	6.1	5.4	-1.1	1.7	-2.8	-4	0.4	0.45	3.48676		9	-2.7	4.8	1.4	-0.6	1.4	2.1	0.9	2.8	1.2625	2.08922
10	-4.1	2.8	3	-0.8	2.9	-3.8	-4.4	-1.7	-0.7625	3.05652		10	-0.8	-1.5	-0.8	1.5	-1.8	-2.2	-2.2	-1	-1.1	1.11915		10	-0.4	-0.3	0.5	1.1	-0.2	-1	-4.4	-2	-0.8375	1.60073
11	2.5	-1.8	2.3	-1.6	4.7	2.1	-1.7	2.2	1.0875	2.29425		11	1	2.6	1.4	-1.6	3.1	-1.8	-2.5	3.2	0.675	2.17873		11	-2.3	1.2	2.7	-1.9	2.9	-3.1	-5.4	1.1	-0.6	2.80936
12	-2.4	1.3	1.3	2.8	-1	-2.9	-0.9	2.8	0.125	2.08911		12	2	-0.6	0.2	1.9	-0.5	-0.2	-1.7	-2	-0.1125	1.37335		12	-0.3	-1.4	2	0.7	-0.1	-1.1	1.3	-0.7	0.05	1.11355
L-sham group
	before								tilt direction	variability			during								tilt direction	variability			after								tilt direction	variability
No	1	2	3	4	5	6	7	8	mean	sd		No	1	2	3	4	5	6	7	8	mean	sd		No	1	2	3	4	5	6	7	8	mean	sd
13	-4	4.8	5.1	-3.5	1	-4.2	-6.4	1.3	-0.7375	4.09632		13	1.4	-3.8	-4.3	1.1	-1.5	2.1	2.3	-1.5	-0.525	2.45191		13	-7	2.9	4.4	-8	5.6	-3	-2.9	4.8	-0.4	5.13931
14	-2.1	0.4	3.6	2.4	2.4	1.6	0.9	-0.9	1.0375	1.75424		14	0	2.4	0.5	2.4	3.1	1.3	2.1	0	1.475	1.12222		14	8.7	-0.4	-4	5	-5.1	2.2	2.4	-4.7	0.5125	4.6563
15	1.1	0.4	-1.9	1.6	-1.4	-1.6	3.4	-0.8	0.1	1.73853		15	2.6	-3.7	-5.4	1	-2.3	3.5	2.1	-0.1	-0.2875	2.9981		15	-3.1	-1	-1.3	-2.9	2.2	-0.8	-2.5	0.9	-1.0625	1.73993
16	2.5	-4.9	-7	2.2	-1.4	4.4	5.8	1.6	0.4	4.18838		16	4.5	0.8	0.3	5	-2.3	5.3	3.9	-1.8	1.9625	2.89393		16	-0.4	4.2	6.2	-0.6	2.1	-4.9	-6.4	-2.3	-0.2625	4.04226
17	1.3	-2	0.8	-0.6	1.9	-1.1	1.4	2.5	0.525	1.47965		17	1.5	-1.1	0.1	-0.2	-2.1	0.3	-0.1	1.5	-0.0125	1.13296		17	-1.5	2.7	1.1	-1.9	1.3	-0.6	-0.5	0.1	0.0875	1.44087
18	-3.3	1.1	1.1	1.3	0.2	-1.7	-0.2	-0.4	-0.2375	1.48655		18	-3.1	-1.5	2.4	0.1	2.6	-1.3	0.1	0.1	-0.075	1.80468		18	4.2	-1.5	-0.5	1.2	-1.4	-1	0.1	0.4	0.1875	1.74745
19	0.4	-0.1	1	2.9	0.7	-1.8	-0.5	0.4	0.375	1.25474		19	-2.6	-1	-0.7	-1.1	-2.8	0.6	3.4	-1.5	-0.7125	1.85097		19	0.1	-1.9	-0.2	-2.5	2.4	0.9	-1.3	1.6	-0.1125	1.6058
20	-3.5	-0.9	-0.2	-2.6	2	-1.8	0.5	2.5	-0.5	1.98746		20	3.5	-2.1	-3	6.2	-6.5	4.3	3.3	-4.6	0.1375	4.42632		20	2.7	-3.2	-2.8	1.2	-1	3.7	3.8	0.5	0.6125	2.57849
21	-5.6	3.2	4.5	-2.1	2.4	-5	-5.7	1.9	-0.8	4		21	-6.6	1.4	3.7	-6.9	3.9	-2.5	-0.6	2.5	-0.6375	4.05646		21	1.4	-2	-0.9	0.1	-3	-2.1	-0.5	-3.8	-1.35	1.59295
22	9.2	-3.2	-3.2	7.2	-2.4	4.9	4.6	-3.4	1.7125	4.94961		22	-2.1	5.2	5	-3.2	4.6	-5.6	-4.6	3.4	0.3375	4.34481		22	3.7	-3.1	-2.3	3	-4.1	5	5.5	-1.9	0.725	3.69214
23	5.4	-7.4	-9.4	7.6	-8.7	10	10.3	-5.8	0.25	8.25348		23	-7.2	5.4	5	-7.5	7.5	-4.1	-3.3	7.1	0.3625	6.07823		23	7.6	-2.7	-1.9	5.7	-4.6	-5.1	5.2	-7.1	-0.3625	5.29999
24	4.2	-2.8	-2.1	6.5	-4.1	1.4	2.4	-3.6	0.2375	3.69423		24	-2.8	-4.9	-8.4	2.8	-3.5	5.1	5.9	-2.2	-1	4.74552		24	-8.8	1.1	4.4	-5.8	2.3	-2.8	-4.9	5	-1.1875	4.77636
R-Vib group
	before								tilt direction	variability			during								tilt direction	variability			after								tilt direction	variability
No	1	2	3	4	5	6	7	8	mean	sd		No	1	2	3	4	5	6	7	8	mean	sd		No	1	2	3	4	5	6	7	8	mean	sd
25	2.4	-3.8	-4.3	1.6	-2.4	7	5.1	-0.7	0.6125	3.86505		25	1.2	-0.3	-1	0.5	-0.2	4.2	4.6	-0.2	1.1	1.99937		25	0.1	-1.1	-3.2	1.2	0.1	0.5	3.1	-3.4	-0.3375	2.04386
26	2.7	-1.4	-2.4	-0.4	-1.7	3.5	-4.5	-5.2	-1.175	2.88433		26	-2.1	0.9	-0.1	1	1	-3.9	-1.3	2.2	-0.2875	1.88112		26	-0.4	3.2	0.7	-1.5	-2.2	-3.9	-3.4	1	-0.8125	2.24913
27	2.1	-1	-3.2	-1	1.1	-3.4	-2.4	2	-0.725	2.0909		27	-3	0.3	1.3	-0.2	1.1	0.8	0.1	1.7	0.2625	1.37016		27	-0.4	2.7	0.4	-1.2	1.9	0.5	-2.5	1.3	0.3375	1.57872
28	2	-1.1	-2.5	-1.7	2.7	0.6	2.2	-3.5	-0.1625	2.20451		28	-2	-0.4	-2.3	-1.3	1	1.4	0.4	2.3	-0.1125	1.5592		28	-1.4	-2.5	-3.7	-1.9	-0.2	0.2	0.7	0.9	-0.9875	1.5447
29	-3.1	4	4.7	-6.9	0.8	-4.6	-6.5	2	-1.2	4.3566		29	-5.5	5.4	5	-1.9	3.5	-5.6	-6	0.9	-0.525	4.55844		29	-4.6	6.8	6.7	-3.1	3.8	-2.1	-6.1	2.1	0.4375	4.75446
30	5.8	-8.7	-9.8	4.6	-5.4	7	7.3	-3	-0.275	6.76734		30	3.6	-6.4	-6.8	0.5	-1.4	5.2	2.8	-0.4	-0.3625	4.12854		30	1.2	-1.5	-6.9	1.3	-0.2	5.1	1.2	0.8	0.125	3.18188
31	-1.8	4.7	4	2.9	4	-2.7	-2.3	-1	0.975	2.99406		31	-1	1.6	0.4	1.3	-0.9	1.8	-0.8	-0.2	0.275	1.09173		31	-2	3.4	3.2	2	2.3	-0.9	-1.8	-0.5	0.7125	2.10145
32	4.2	2	-2.1	0.8	-4.3	-0.3	2	-3.1	-0.1	2.71109		32	-0.1	2.1	0.2	0.2	-2	-1	0	-1.3	-0.2375	1.1586		32	2.5	0.9	1.2	2	-1.9	0	1.6	-0.3	0.75	1.3351
33	-1.4	2.6	3	-2.1	1.2	-2.2	-4	3.5	0.075	2.66024		33	-0.7	2.1	3.8	-0.9	2	-1.6	-4.2	1.8	0.2875	2.422		33	-1.9	2.5	2.5	-3.6	2.7	-1.7	-2.8	3.2	0.1125	2.67462
34	4.1	-0.6	-3.4	-1.2	-3.1	-1.3	-1.9	-1	-1.05	2.15812		34	1.1	-0.3	0.9	-0.3	0	-1.8	-2	0.3	-0.2625	1.05941		34	0.5	1.1	0.6	-0.8	1.2	-3.5	-0.7	-0.1	-0.2125	1.42692
35	2.3	-1.3	-4.6	-1	-3.6	1.8	2.3	-2.1	-0.775	2.50587		35	0.1	-3.3	-1.2	-3.3	-0.6	0.2	1	-1	-1.0125	1.47601		35	-0.1	-1.1	-4.1	-0.8	-1.9	0.8	0.2	-2	-1.125	1.45065
36	5.6	-3.9	-3.2	7.2	-5.6	2.2	5.9	-8.9	-0.0875	5.6878		36	4	-5	-3.7	-4.9	-4.2	2	2.4	-6	-1.925	3.74925		36	3.2	-2.1	-4.5	4.1	-1.1	4.7	2	-7.6	-0.1625	4.13157
R-sham group
	before								tilt direction	variability			during								tilt direction	variability			after								tilt direction	variability
No	1	2	3	4	5	6	7	8	mean	sd		No	1	2	3	4	5	6	7	8	mean	sd		No	1	2	3	4	5	6	7	8	mean	sd
37	-3.4	-3.2	-2.9	-1.7	0.5	3	0.4	-0.2	-0.9375	2.10709		37	0.5	-2.1	2.5	2.4	-4.8	-2.7	-1	0.9	-0.5375	2.41088		37	4	-1.3	-3.9	1.8	-2.7	-1.6	-1	-1.4	-0.7625	2.35316
38	9.4	-3.2	-2.2	8	-9.1	2.9	1.7	-3.7	0.475	5.84631		38	-7.7	5.4	9	-7.7	6.6	-2.6	-1.5	7.5	1.125	6.39761		38	2.8	-7.2	-8.6	2.4	-2.2	5.1	4.2	-2.4	-0.7375	4.8644
39	-1.1	2	1.6	-4.5	1.1	-6	-3.1	1.6	-1.05	2.92788		39	-0.5	2.4	1	-1.8	2	-2	-1	3	0.3875	1.83878		39	-6.6	0.2	-1.3	0.3	-1.7	-1.3	-0.6	-6.6	-2.2	2.62583
40	5.6	-2.7	-5	5.2	-7	2.6	4	-5.3	-0.325	4.86948		40	-5.8	2.2	3.5	-6.7	3.8	-3.5	-4.1	1.3	-1.1625	4.03111		40	2	-6.1	-5.5	0.1	-2	0.6	2.5	-0.7	-1.1375	3.00455
41	-3.2	1.4	1.7	-4.9	3.8	-1.9	-0.1	2.9	-0.0375	2.86266		41	1	-5	-5.9	-1.1	-1.4	1.9	0.3	-3.6	-1.725	2.6654		41	8	-6.3	-6.3	7.3	-9.1	3.6	5.2	-8	-0.7	6.88803
42	-6.5	3.5	3.3	-5.8	2.5	1.3	-3.8	4.2	-0.1625	4.16591		42	3.9	2	1.9	3.4	0.4	-1.7	1.5	-1.1	1.2875	1.85838		42	-2.3	-2.2	-2.3	-0.5	1.6	-0.6	2.2	0.2	-0.4875	1.64198
43	7.6	-2.7	-1.9	5.7	-4.6	-5.1	5.2	-7.1	-0.3625	5.29999		43	5.4	-7.4	-9.4	7.6	-8.7	10	10.3	-5.8	0.25	8.25348		43	-7.2	5.4	5	-7.5	7.5	-4.1	-3.3	7.1	0.3625	6.07823
44	-8.8	1.1	4.4	-5.8	2.3	-2.8	-4.9	5	-1.1875	4.77636		44	4.2	-2.8	-2.1	6.5	-4.1	1.4	2.4	-3.6	0.2375	3.69423		44	-2.8	-4.9	-8.4	2.8	-3.5	5.1	5.9	-2.2	-1	4.74552
45	1	2.3	2.2	-1.5	4.9	-0.2	0.1	1.7	1.3125	1.8217		45	6.9	-4.5	-4.2	7.5	-6.3	0.8	2.5	-3.4	-0.0875	4.99786		45	3.6	-0.8	-1.7	0.8	1.5	2.2	-1.7	1.5	0.675	1.79287
46	-2.9	0.8	-1.2	-1.4	-1.9	2.8	1.7	0.8	-0.1625	1.84454		46	2.4	-2	-1.7	-1.6	-0.5	-2	0.8	-0.4	-0.625	1.46351		46	2.7	0.7	-1.6	4.5	-0.4	0.2	1.6	-2.8	0.6125	2.18486
47	4.2	-1.5	-0.5	1.2	-1.4	-1	0.1	0.4	0.1875	1.74745		47	-3.3	1.1	1.1	1.3	0.2	-1.7	-0.2	-0.4	-0.2375	1.48655		47	-3.1	-1.5	2.4	0.1	2.6	-1.3	0.1	0.1	-0.075	1.80468
48	0.1	-1.9	-0.2	-2.5	2.4	0.9	-1.3	1.6	-0.1125	1.6058		48	0.4	-0.1	1	2.9	0.7	-1.8	-0.5	0.4	0.375	1.25474		48	-2.6	-1	-0.7	-1.1	-2.8	0.6	3.4	-1.5	-0.7125	1.85097

## Sheet: Analysis data
		tilt direction				variability
No	groups	before	during	after		before	during	after
1	L-Vib	-0.35	0.3	-0.45		2.13834	1.02591	1.2145
2	L-Vib	-0.9125	-0.8125	-0.6875		2.34224	0.780124	1.2015
3	L-Vib	-1.8375	-1.15	-0.3375		3.54293	2.27541	1.06294
4	L-Vib	-0.4375	0.1625	-0.925		4.48997	2.20451	3.61585
5	L-Vib	1.75	0.375	0.575		1.92808	1.18295	1.25574
6	L-Vib	-1.6375	-1.25	-0.7625		2.83722	0.89861	1.06176
7	L-Vib	0.25	0.2625	0.3625		2.59326	2.07421	2.34251
8	L-Vib	-0.275	0.3625	0.275		6.76734	3.82522	4.56173
9	L-Vib	0.125	0.45	1.2625		4.69541	3.48676	2.08922
10	L-Vib	-0.7625	-1.1	-0.8375		3.05652	1.11915	1.60073
11	L-Vib	1.0875	0.675	-0.6		2.29425	2.17873	2.80936
12	L-Vib	0.125	-0.1125	0.05		2.08911	1.37335	1.11355
13	L-sham	-0.7375	-0.525	-0.4		4.09632	2.45191	5.1
14	L-sham	1.0375	1.475	0.5125		1.75424	1.12222	4.6563
15	L-sham	0.1	-0.2875	-1.0625		1.73853	2.9981	1.73993
16	L-sham	-0.295183	2.03882	0.909678		3.67007	2.62623	3.2124
17	L-sham	0.525	-0.0125	0.0875		1.47965	1.13296	1.44087
18	L-sham	-0.2375	-0.075	0.1875		1.48655	1.80468	1.74745
19	L-sham	0.375	-0.7125	-0.1125		1.25474	1.85097	1.6058
20	L-sham	-0.5	0.1375	0.6125		1.98746	4.42632	2.57849
21	L-sham	-0.8	-0.6375	-1.35		4	4.05646	1.59295
22	L-sham	1.7125	0.3375	0.725		4.94961	4.34481	3.69214
23	L-sham	0.25	0.3625	-0.3625		8.3	6.07823	5.29999
24	L-sham	0.2375	-1	-1.1875		3.69423	4.74552	4.77636
25	R-Vib	0.6125	1.1	-0.3375		3.86505	1.99937	2.04386
26	R-Vib	-1.175	-0.2875	-0.8125		2.88433	1.88112	2.24913
27	R-Vib	-0.725	0.2625	0.3375		2.0909	1.37016	1.57872
28	R-Vib	-0.1625	-0.1125	-0.9875		2.20451	1.5592	1.5447
29	R-Vib	-1.2	-0.525	-0.44		4.3566	4.55844	4.75
30	R-Vib	-0.275	-0.3625	0.125		6.76734	4.12854	3.18188
31	R-Vib	0.975	0.275	0.7125		2.99406	1.09173	2.10145
32	R-Vib	-0.1	-0.2375	0.75		2.71109	1.1586	1.3351
33	R-Vib	0.075	0.2875	0.1125		2.66024	2.422	2.67462
34	R-Vib	-1.05	-0.2625	-0.2125		2.15812	1.05941	1.42692
35	R-Vib	-0.775	-1.0125	-1.125		2.50587	1.47601	1.45065
36	R-Vib	-0.0875	-1.9625	-0.1625		5.6878	3.74925	4.13157
37	R-sham	-0.9375	-0.5375	-0.7625		2.10709	2.41088	2.35316
38	R-sham	0.475	1.125	-0.7375		5.84631	6.4	4.8644
39	R-sham	-1.05	0.39	-2.2		2.9	1.8	2.62583
40	R-sham	-0.325	-1.16	-1.1375		4.9	4	3.00455
41	R-sham	-0.0375	-1.725	-0.7		2.86266	2.6654	6.88803
42	R-sham	-0.1625	1.2875	-0.4875		4.16591	1.85838	1.64198
43	R-sham	-0.3625	0.25	0.3625		5.29999	8.3	6.07823
44	R-sham	-1.1875	0.2375	-1		4.77636	3.69423	4.74552
45	R-sham	1.3125	-0.0875	0.675		1.8217	4.99786	1.79287
46	R-sham	-0.1625	-0.625	0.6125		1.84454	1.46351	2.18486
47	R-sham	0.1875	-0.2375	-0.075		1.74745	1.48655	1.80468
48	R-sham	-0.1125	0.375	-0.7125		1.6058	1.25474	1.85097

## Sheet: starting angle & position
No	groups	condition	stim_side	timepoint	trial_number	trial_order_in_session	SPV_angle_deg	starting_angle_deg	initial_inclination_side
1	L-Vib	NMV	Left	before	1	1	-2.2	20	Left
1	L-Vib	NMV	Left	before	2	2	-1.7	15	Right
1	L-Vib	NMV	Left	before	3	3	0.3	15	Right
1	L-Vib	NMV	Left	before	4	4	-4	20	Left
1	L-Vib	NMV	Left	before	5	5	1.9	20	Right
1	L-Vib	NMV	Left	before	6	6	0.7	15	Left
1	L-Vib	NMV	Left	before	7	7	-0.8	15	Left
1	L-Vib	NMV	Left	before	8	8	3	20	Right
1	L-Vib	NMV	Left	during	1	9	1	20	Left
1	L-Vib	NMV	Left	during	2	10	-0.2	15	Right
1	L-Vib	NMV	Left	during	3	11	2.4	15	Right
1	L-Vib	NMV	Left	during	4	12	-0.8	20	Left
1	L-Vib	NMV	Left	during	5	13	0.2	20	Right
1	L-Vib	NMV	Left	during	6	14	0.6	15	Left
1	L-Vib	NMV	Left	during	7	15	-1.1	15	Left
1	L-Vib	NMV	Left	during	8	16	0.3	20	Right
1	L-Vib	NMV	Left	after	1	17	-2.3	20	Left
1	L-Vib	NMV	Left	after	2	18	-1.4	15	Right
1	L-Vib	NMV	Left	after	3	19	-0.8	15	Right
1	L-Vib	NMV	Left	after	4	20	-1.4	20	Left
1	L-Vib	NMV	Left	after	5	21	-0.4	20	Right
1	L-Vib	NMV	Left	after	6	22	0.6	15	Left
1	L-Vib	NMV	Left	after	7	23	0.4	15	Left
1	L-Vib	NMV	Left	after	8	24	1.7	20	Right
2	L-Vib	NMV	Left	before	1	1	2.8	15	Right
2	L-Vib	NMV	Left	before	2	2	0.3	20	Left
2	L-Vib	NMV	Left	before	3	3	0.1	20	Left
2	L-Vib	NMV	Left	before	4	4	1.7	15	Right
2	L-Vib	NMV	Left	before	5	5	-4.2	15	Left
2	L-Vib	NMV	Left	before	6	6	-2.8	20	Right
2	L-Vib	NMV	Left	before	7	7	-2	20	Right
2	L-Vib	NMV	Left	before	8	8	-3.2	15	Left
2	L-Vib	NMV	Left	during	1	9	-0.6	15	Right
2	L-Vib	NMV	Left	during	2	10	-0.6	20	Left
2	L-Vib	NMV	Left	during	3	11	0.1	20	Left
2	L-Vib	NMV	Left	during	4	12	-1	15	Right
2	L-Vib	NMV	Left	during	5	13	-0.3	15	Left
2	L-Vib	NMV	Left	during	6	14	-2.4	20	Right
2	L-Vib	NMV	Left	during	7	15	-1.6	20	Right
2	L-Vib	NMV	Left	during	8	16	-0.1	15	Left
2	L-Vib	NMV	Left	after	1	17	0.9	15	Right
2	L-Vib	NMV	Left	after	2	18	-0.8	20	Left
2	L-Vib	NMV	Left	after	3	19	1.7	20	Left
2	L-Vib	NMV	Left	after	4	20	-1.2	15	Right
2	L-Vib	NMV	Left	after	5	21	-1.5	15	Left
2	L-Vib	NMV	Left	after	6	22	-1.5	20	Right
2	L-Vib	NMV	Left	after	7	23	-1.2	20	Right
2	L-Vib	NMV	Left	after	8	24	-1.9	15	Left
3	L-Vib	NMV	Left	before	1	1	-0.5	20	Right
3	L-Vib	NMV	Left	before	2	2	-7	15	Left
3	L-Vib	NMV	Left	before	3	3	-7.9	15	Left
3	L-Vib	NMV	Left	before	4	4	-2.2	20	Right
3	L-Vib	NMV	Left	before	5	5	-1.4	20	Left
3	L-Vib	NMV	Left	before	6	6	0.7	15	Right
3	L-Vib	NMV	Left	before	7	7	0.8	15	Right
3	L-Vib	NMV	Left	before	8	8	2.8	20	Left
3	L-Vib	NMV	Left	during	1	9	0.5	20	Right
3	L-Vib	NMV	Left	during	2	10	-3.1	15	Left
3	L-Vib	NMV	Left	during	3	11	-4.6	15	Left
3	L-Vib	NMV	Left	during	4	12	-3.5	20	Right
3	L-Vib	NMV	Left	during	5	13	-0.8	20	Left
3	L-Vib	NMV	Left	during	6	14	0	15	Right
3	L-Vib	NMV	Left	during	7	15	-0.5	15	Right
3	L-Vib	NMV	Left	during	8	16	2.8	20	Left
3	L-Vib	NMV	Left	after	1	17	-0.2	20	Right
3	L-Vib	NMV	Left	after	2	18	-1	15	Left
3	L-Vib	NMV	Left	after	3	19	-1.2	15	Left
3	L-Vib	NMV	Left	after	4	20	-2.1	20	Right
3	L-Vib	NMV	Left	after	5	21	0.2	20	Left
3	L-Vib	NMV	Left	after	6	22	-0.3	15	Right
3	L-Vib	NMV	Left	after	7	23	0.2	15	Right
3	L-Vib	NMV	Left	after	8	24	1.7	20	Left
4	L-Vib	NMV	Left	before	1	1	-4.2	15	Right
4	L-Vib	NMV	Left	before	2	2	6.2	20	Left
4	L-Vib	NMV	Left	before	3	3	6.1	20	Left
4	L-Vib	NMV	Left	before	4	4	-1.1	15	Right
4	L-Vib	NMV	Left	before	5	5	0.1	15	Left
4	L-Vib	NMV	Left	before	6	6	-5.9	20	Right
4	L-Vib	NMV	Left	before	7	7	-5.7	20	Right
4	L-Vib	NMV	Left	before	8	8	1	15	Left
4	L-Vib	NMV	Left	during	1	9	-1.6	15	Right
4	L-Vib	NMV	Left	during	2	10	3.5	20	Left
4	L-Vib	NMV	Left	during	3	11	2	20	Left
4	L-Vib	NMV	Left	during	4	12	-0.3	15	Right
4	L-Vib	NMV	Left	during	5	13	1.6	15	Left
4	L-Vib	NMV	Left	during	6	14	1.1	20	Right
4	L-Vib	NMV	Left	during	7	15	-3.9	20	Right
4	L-Vib	NMV	Left	during	8	16	-1.1	15	Left
4	L-Vib	NMV	Left	after	1	17	0.6	15	Right
4	L-Vib	NMV	Left	after	2	18	3.1	20	Left
4	L-Vib	NMV	Left	after	3	19	4.8	20	Left
4	L-Vib	NMV	Left	after	4	20	-0.5	15	Right
4	L-Vib	NMV	Left	after	5	21	-1	15	Left
4	L-Vib	NMV	Left	after	6	22	-6.2	20	Right
4	L-Vib	NMV	Left	after	7	23	-5.7	20	Right
4	L-Vib	NMV	Left	after	8	24	-2.5	15	Left
5	L-Vib	NMV	Left	before	1	1	4.5	15	Left
5	L-Vib	NMV	Left	before	2	2	-0.2	20	Right
5	L-Vib	NMV	Left	before	3	3	-0.6	20	Right
5	L-Vib	NMV	Left	before	4	4	4.7	15	Left
5	L-Vib	NMV	Left	before	5	5	0.1	15	Right
5	L-Vib	NMV	Left	before	6	6	1.4	20	Left
5	L-Vib	NMV	Left	before	7	7	1.3	20	Left
5	L-Vib	NMV	Left	before	8	8	2.8	15	Right
5	L-Vib	NMV	Left	during	1	9	1.1	15	Left
5	L-Vib	NMV	Left	during	2	10	0.1	20	Right
5	L-Vib	NMV	Left	during	3	11	1.1	20	Right
5	L-Vib	NMV	Left	during	4	12	2.5	15	Left
5	L-Vib	NMV	Left	during	5	13	-1.4	15	Right
5	L-Vib	NMV	Left	during	6	14	-0.2	20	Left
5	L-Vib	NMV	Left	during	7	15	0.8	20	Left
5	L-Vib	NMV	Left	during	8	16	-1	15	Right
5	L-Vib	NMV	Left	after	1	17	1.2	15	Left
5	L-Vib	NMV	Left	after	2	18	0.7	20	Right
5	L-Vib	NMV	Left	after	3	19	-0.3	20	Right
5	L-Vib	NMV	Left	after	4	20	3.1	15	Left
5	L-Vib	NMV	Left	after	5	21	-1.5	15	Right
5	L-Vib	NMV	Left	after	6	22	-0.1	20	Left
5	L-Vib	NMV	Left	after	7	23	0.4	20	Left
5	L-Vib	NMV	Left	after	8	24	1.1	15	Right
6	L-Vib	NMV	Left	before	1	1	-4.8	15	Right
6	L-Vib	NMV	Left	before	2	2	-1	20	Left
6	L-Vib	NMV	Left	before	3	3	-1.2	20	Left
6	L-Vib	NMV	Left	before	4	4	-5.8	15	Right
6	L-Vib	NMV	Left	before	5	5	2.8	15	Left
6	L-Vib	NMV	Left	before	6	6	-2.6	20	Right
6	L-Vib	NMV	Left	before	7	7	-2.7	20	Right
6	L-Vib	NMV	Left	before	8	8	2.2	15	Left
6	L-Vib	NMV	Left	during	1	9	-3.3	15	Right
6	L-Vib	NMV	Left	during	2	10	-1.1	20	Left
6	L-Vib	NMV	Left	during	3	11	-1.6	20	Left
6	L-Vib	NMV	Left	during	4	12	-1.1	15	Right
6	L-Vib	NMV	Left	during	5	13	0	15	Left
6	L-Vib	NMV	Left	during	6	14	-1.4	20	Right
6	L-Vib	NMV	Left	during	7	15	-0.7	20	Right
6	L-Vib	NMV	Left	during	8	16	-0.8	15	Left
6	L-Vib	NMV	Left	after	1	17	-2.3	15	Right
6	L-Vib	NMV	Left	after	2	18	-1.6	20	Left
6	L-Vib	NMV	Left	after	3	19	0	20	Left
6	L-Vib	NMV	Left	after	4	20	-1.5	15	Right
6	L-Vib	NMV	Left	after	5	21	0.2	15	Left
6	L-Vib	NMV	Left	after	6	22	-0.6	20	Right
6	L-Vib	NMV	Left	after	7	23	-1.4	20	Right
6	L-Vib	NMV	Left	after	8	24	1.1	15	Left
7	L-Vib	NMV	Left	before	1	1	3.3	20	Right
7	L-Vib	NMV	Left	before	2	2	1.1	15	Left
7	L-Vib	NMV	Left	before	3	3	-1.3	15	Left
7	L-Vib	NMV	Left	before	4	4	1.5	20	Right
7	L-Vib	NMV	Left	before	5	5	-4.3	20	Left
7	L-Vib	NMV	Left	before	6	6	1.3	15	Right
7	L-Vib	NMV	Left	before	7	7	3.2	15	Right
7	L-Vib	NMV	Left	before	8	8	-2.8	20	Left
7	L-Vib	NMV	Left	during	1	9	3.9	20	Right
7	L-Vib	NMV	Left	during	2	10	-0.8	15	Left
7	L-Vib	NMV	Left	during	3	11	1	15	Left
7	L-Vib	NMV	Left	during	4	12	2.7	20	Right
7	L-Vib	NMV	Left	during	5	13	-1.3	20	Left
7	L-Vib	NMV	Left	during	6	14	-0.8	15	Right
7	L-Vib	NMV	Left	during	7	15	0.3	15	Right
7	L-Vib	NMV	Left	during	8	16	-2.9	20	Left
7	L-Vib	NMV	Left	after	1	17	2.7	20	Right
7	L-Vib	NMV	Left	after	2	18	2	15	Left
7	L-Vib	NMV	Left	after	3	19	4.1	15	Left
7	L-Vib	NMV	Left	after	4	20	1.4	20	Right
7	L-Vib	NMV	Left	after	5	21	-2.4	20	Left
7	L-Vib	NMV	Left	after	6	22	-2.4	15	Right
7	L-Vib	NMV	Left	after	7	23	-0.9	15	Right
7	L-Vib	NMV	Left	after	8	24	-1.6	20	Left
8	L-Vib	NMV	Left	before	1	1	5.8	20	Right
8	L-Vib	NMV	Left	before	2	2	-8.7	15	Left
8	L-Vib	NMV	Left	before	3	3	-9.8	15	Left
8	L-Vib	NMV	Left	before	4	4	4.6	20	Right
8	L-Vib	NMV	Left	before	5	5	-5.4	20	Left
8	L-Vib	NMV	Left	before	6	6	7	15	Right
8	L-Vib	NMV	Left	before	7	7	7.3	15	Right
8	L-Vib	NMV	Left	before	8	8	-3	20	Left
8	L-Vib	NMV	Left	during	1	9	-4.8	20	Right
8	L-Vib	NMV	Left	during	2	10	1.1	15	Left
8	L-Vib	NMV	Left	during	3	11	4.6	15	Left
8	L-Vib	NMV	Left	during	4	12	-5.6	20	Right
8	L-Vib	NMV	Left	during	5	13	3.7	20	Left
8	L-Vib	NMV	Left	during	6	14	1	15	Right
8	L-Vib	NMV	Left	during	7	15	-1.9	15	Right
8	L-Vib	NMV	Left	during	8	16	4.8	20	Left
8	L-Vib	NMV	Left	after	1	17	-6	20	Right
8	L-Vib	NMV	Left	after	2	18	2.1	15	Left
8	L-Vib	NMV	Left	after	3	19	2.2	15	Left
8	L-Vib	NMV	Left	after	4	20	-4.2	20	Right
8	L-Vib	NMV	Left	after	5	21	6.1	20	Left
8	L-Vib	NMV	Left	after	6	22	0	15	Right
8	L-Vib	NMV	Left	after	7	23	-4.7	15	Right
8	L-Vib	NMV	Left	after	8	24	6.7	20	Left
9	L-Vib	NMV	Left	before	1	1	-4.3	20	Left
9	L-Vib	NMV	Left	before	2	2	6.3	15	Right
9	L-Vib	NMV	Left	before	3	3	6.3	15	Right
9	L-Vib	NMV	Left	before	4	4	-2.7	20	Left
9	L-Vib	NMV	Left	before	5	5	3.4	20	Right
9	L-Vib	NMV	Left	before	6	6	-4.3	15	Left
9	L-Vib	NMV	Left	before	7	7	-6	15	Left
9	L-Vib	NMV	Left	before	8	8	2.3	20	Right
9	L-Vib	NMV	Left	during	1	9	-2.1	20	Left
9	L-Vib	NMV	Left	during	2	10	6.1	15	Right
9	L-Vib	NMV	Left	during	3	11	5.4	15	Right
9	L-Vib	NMV	Left	during	4	12	-1.1	20	Left
9	L-Vib	NMV	Left	during	5	13	1.7	20	Right
9	L-Vib	NMV	Left	during	6	14	-2.8	15	Left
9	L-Vib	NMV	Left	during	7	15	-4	15	Left
9	L-Vib	NMV	Left	during	8	16	0.4	20	Right
9	L-Vib	NMV	Left	after	1	17	-2.7	20	Left
9	L-Vib	NMV	Left	after	2	18	4.8	15	Right
9	L-Vib	NMV	Left	after	3	19	1.4	15	Right
9	L-Vib	NMV	Left	after	4	20	-0.6	20	Left
9	L-Vib	NMV	Left	after	5	21	1.4	20	Right
9	L-Vib	NMV	Left	after	6	22	2.1	15	Left
9	L-Vib	NMV	Left	after	7	23	0.9	15	Left
9	L-Vib	NMV	Left	after	8	24	2.8	20	Right
10	L-Vib	NMV	Left	before	1	1	-4.1	15	Left
10	L-Vib	NMV	Left	before	2	2	2.8	20	Right
10	L-Vib	NMV	Left	before	3	3	3	20	Right
10	L-Vib	NMV	Left	before	4	4	-0.8	15	Left
10	L-Vib	NMV	Left	before	5	5	2.9	15	Right
10	L-Vib	NMV	Left	before	6	6	-3.8	20	Left
10	L-Vib	NMV	Left	before	7	7	-4.4	20	Left
10	L-Vib	NMV	Left	before	8	8	-1.7	15	Right
10	L-Vib	NMV	Left	during	1	9	-0.8	15	Left
10	L-Vib	NMV	Left	during	2	10	-1.5	20	Right
10	L-Vib	NMV	Left	during	3	11	-0.8	20	Right
10	L-Vib	NMV	Left	during	4	12	1.5	15	Left
10	L-Vib	NMV	Left	during	5	13	-1.8	15	Right
10	L-Vib	NMV	Left	during	6	14	-2.2	20	Left
10	L-Vib	NMV	Left	during	7	15	-2.2	20	Left
10	L-Vib	NMV	Left	during	8	16	-1	15	Right
10	L-Vib	NMV	Left	after	1	17	-0.4	15	Left
10	L-Vib	NMV	Left	after	2	18	-0.3	20	Right
10	L-Vib	NMV	Left	after	3	19	0.5	20	Right
10	L-Vib	NMV	Left	after	4	20	1.1	15	Left
10	L-Vib	NMV	Left	after	5	21	-0.2	15	Right
10	L-Vib	NMV	Left	after	6	22	-1	20	Left
10	L-Vib	NMV	Left	after	7	23	-4.4	20	Left
10	L-Vib	NMV	Left	after	8	24	-2	15	Right
11	L-Vib	NMV	Left	before	1	1	2.5	15	Left
11	L-Vib	NMV	Left	before	2	2	-1.8	20	Right
11	L-Vib	NMV	Left	before	3	3	2.3	20	Right
11	L-Vib	NMV	Left	before	4	4	-1.6	15	Left
11	L-Vib	NMV	Left	before	5	5	4.7	15	Right
11	L-Vib	NMV	Left	before	6	6	2.1	20	Left
11	L-Vib	NMV	Left	before	7	7	-1.7	20	Left
11	L-Vib	NMV	Left	before	8	8	2.2	15	Right
11	L-Vib	NMV	Left	during	1	9	1	15	Left
11	L-Vib	NMV	Left	during	2	10	2.6	20	Right
11	L-Vib	NMV	Left	during	3	11	1.4	20	Right
11	L-Vib	NMV	Left	during	4	12	-1.6	15	Left
11	L-Vib	NMV	Left	during	5	13	3.1	15	Right
11	L-Vib	NMV	Left	during	6	14	-1.8	20	Left
11	L-Vib	NMV	Left	during	7	15	-2.5	20	Left
11	L-Vib	NMV	Left	during	8	16	3.2	15	Right
11	L-Vib	NMV	Left	after	1	17	-2.3	15	Left
11	L-Vib	NMV	Left	after	2	18	1.2	20	Right
11	L-Vib	NMV	Left	after	3	19	2.7	20	Right
11	L-Vib	NMV	Left	after	4	20	-1.9	15	Left
11	L-Vib	NMV	Left	after	5	21	2.9	15	Right
11	L-Vib	NMV	Left	after	6	22	-3.1	20	Left
11	L-Vib	NMV	Left	after	7	23	-5.4	20	Left
11	L-Vib	NMV	Left	after	8	24	1.1	15	Right
12	L-Vib	NMV	Left	before	1	1	-2.4	20	Left
12	L-Vib	NMV	Left	before	2	2	1.3	15	Right
12	L-Vib	NMV	Left	before	3	3	1.3	15	Right
12	L-Vib	NMV	Left	before	4	4	2.8	20	Left
12	L-Vib	NMV	Left	before	5	5	-1	20	Right
12	L-Vib	NMV	Left	before	6	6	-2.9	15	Left
12	L-Vib	NMV	Left	before	7	7	-0.9	15	Left
12	L-Vib	NMV	Left	before	8	8	2.8	20	Right
12	L-Vib	NMV	Left	during	1	9	2	20	Left
12	L-Vib	NMV	Left	during	2	10	-0.6	15	Right
12	L-Vib	NMV	Left	during	3	11	0.2	15	Right
12	L-Vib	NMV	Left	during	4	12	1.9	20	Left
12	L-Vib	NMV	Left	during	5	13	-0.5	20	Right
12	L-Vib	NMV	Left	during	6	14	-0.2	15	Left
12	L-Vib	NMV	Left	during	7	15	-1.7	15	Left
12	L-Vib	NMV	Left	during	8	16	-2	20	Right
12	L-Vib	NMV	Left	after	1	17	-0.3	20	Left
12	L-Vib	NMV	Left	after	2	18	-1.4	15	Right
12	L-Vib	NMV	Left	after	3	19	2	15	Right
12	L-Vib	NMV	Left	after	4	20	0.7	20	Left
12	L-Vib	NMV	Left	after	5	21	-0.1	20	Right
12	L-Vib	NMV	Left	after	6	22	-1.1	15	Left
12	L-Vib	NMV	Left	after	7	23	1.3	15	Left
12	L-Vib	NMV	Left	after	8	24	-0.7	20	Right
13	L-sham	Sham	Left	before	1	1	-4	20	Right
13	L-sham	Sham	Left	before	2	2	4.8	15	Left
13	L-sham	Sham	Left	before	3	3	5.1	15	Left
13	L-sham	Sham	Left	before	4	4	-3.5	20	Right
13	L-sham	Sham	Left	before	5	5	1	20	Left
13	L-sham	Sham	Left	before	6	6	-4.2	15	Right
13	L-sham	Sham	Left	before	7	7	-6.4	15	Right
13	L-sham	Sham	Left	before	8	8	1.3	20	Left
13	L-sham	Sham	Left	during	1	9	1.4	20	Right
13	L-sham	Sham	Left	during	2	10	-3.8	15	Left
13	L-sham	Sham	Left	during	3	11	-4.3	15	Left
13	L-sham	Sham	Left	during	4	12	1.1	20	Right
13	L-sham	Sham	Left	during	5	13	-1.5	20	Left
13	L-sham	Sham	Left	during	6	14	2.1	15	Right
13	L-sham	Sham	Left	during	7	15	2.3	15	Right
13	L-sham	Sham	Left	during	8	16	-1.5	20	Left
13	L-sham	Sham	Left	after	1	17	-7	20	Right
13	L-sham	Sham	Left	after	2	18	2.9	15	Left
13	L-sham	Sham	Left	after	3	19	4.4	15	Left
13	L-sham	Sham	Left	after	4	20	-8	20	Right
13	L-sham	Sham	Left	after	5	21	5.6	20	Left
13	L-sham	Sham	Left	after	6	22	-3	15	Right
13	L-sham	Sham	Left	after	7	23	-2.9	15	Right
13	L-sham	Sham	Left	after	8	24	4.8	20	Left
14	L-sham	Sham	Left	before	1	1	-2.1	20	Left
14	L-sham	Sham	Left	before	2	2	0.4	15	Right
14	L-sham	Sham	Left	before	3	3	3.6	15	Right
14	L-sham	Sham	Left	before	4	4	2.4	20	Left
14	L-sham	Sham	Left	before	5	5	2.4	20	Right
14	L-sham	Sham	Left	before	6	6	1.6	15	Left
14	L-sham	Sham	Left	before	7	7	0.9	15	Left
14	L-sham	Sham	Left	before	8	8	-0.9	20	Right
14	L-sham	Sham	Left	during	1	9	0	20	Left
14	L-sham	Sham	Left	during	2	10	2.4	15	Right
14	L-sham	Sham	Left	during	3	11	0.5	15	Right
14	L-sham	Sham	Left	during	4	12	2.4	20	Left
14	L-sham	Sham	Left	during	5	13	3.1	20	Right
14	L-sham	Sham	Left	during	6	14	1.3	15	Left
14	L-sham	Sham	Left	during	7	15	2.1	15	Left
14	L-sham	Sham	Left	during	8	16	0	20	Right
14	L-sham	Sham	Left	after	1	17	8.7	20	Left
14	L-sham	Sham	Left	after	2	18	-0.4	15	Right
14	L-sham	Sham	Left	after	3	19	-4	15	Right
14	L-sham	Sham	Left	after	4	20	5	20	Left
14	L-sham	Sham	Left	after	5	21	-5.1	20	Right
14	L-sham	Sham	Left	after	6	22	2.2	15	Left
14	L-sham	Sham	Left	after	7	23	2.4	15	Left
14	L-sham	Sham	Left	after	8	24	-4.7	20	Right
15	L-sham	Sham	Left	before	1	1	1.1	15	Left
15	L-sham	Sham	Left	before	2	2	0.4	20	Right
15	L-sham	Sham	Left	before	3	3	-1.9	20	Right
15	L-sham	Sham	Left	before	4	4	1.6	15	Left
15	L-sham	Sham	Left	before	5	5	-1.4	15	Right
15	L-sham	Sham	Left	before	6	6	-1.6	20	Left
15	L-sham	Sham	Left	before	7	7	3.4	20	Left
15	L-sham	Sham	Left	before	8	8	-0.8	15	Right
15	L-sham	Sham	Left	during	1	9	2.6	15	Left
15	L-sham	Sham	Left	during	2	10	-3.7	20	Right
15	L-sham	Sham	Left	during	3	11	-5.4	20	Right
15	L-sham	Sham	Left	during	4	12	1	15	Left
15	L-sham	Sham	Left	during	5	13	-2.3	15	Right
15	L-sham	Sham	Left	during	6	14	3.5	20	Left
15	L-sham	Sham	Left	during	7	15	2.1	20	Left
15	L-sham	Sham	Left	during	8	16	-0.1	15	Right
15	L-sham	Sham	Left	after	1	17	-3.1	15	Left
15	L-sham	Sham	Left	after	2	18	-1	20	Right
15	L-sham	Sham	Left	after	3	19	-1.3	20	Right
15	L-sham	Sham	Left	after	4	20	-2.9	15	Left
15	L-sham	Sham	Left	after	5	21	2.2	15	Right
15	L-sham	Sham	Left	after	6	22	-0.8	20	Left
15	L-sham	Sham	Left	after	7	23	-2.5	20	Left
15	L-sham	Sham	Left	after	8	24	0.9	15	Right
16	L-sham	Sham	Left	before	1	1	2.5	15	Right
16	L-sham	Sham	Left	before	2	2	-4.9	20	Left
16	L-sham	Sham	Left	before	3	3	-7	20	Left
16	L-sham	Sham	Left	before	4	4	2.2	15	Right
16	L-sham	Sham	Left	before	5	5	-1.4	15	Left
16	L-sham	Sham	Left	before	6	6	4.4	20	Right
16	L-sham	Sham	Left	before	7	7	5.8	20	Right
16	L-sham	Sham	Left	before	8	8	1.6	15	Left
16	L-sham	Sham	Left	during	1	9	4.5	15	Right
16	L-sham	Sham	Left	during	2	10	0.8	20	Left
16	L-sham	Sham	Left	during	3	11	0.3	20	Left
16	L-sham	Sham	Left	during	4	12	5	15	Right
16	L-sham	Sham	Left	during	5	13	-2.3	15	Left
16	L-sham	Sham	Left	during	6	14	5.3	20	Right
16	L-sham	Sham	Left	during	7	15	3.9	20	Right
16	L-sham	Sham	Left	during	8	16	-1.8	15	Left
16	L-sham	Sham	Left	after	1	17	-0.4	15	Right
16	L-sham	Sham	Left	after	2	18	4.2	20	Left
16	L-sham	Sham	Left	after	3	19	6.2	20	Left
16	L-sham	Sham	Left	after	4	20	-0.6	15	Right
16	L-sham	Sham	Left	after	5	21	2.1	15	Left
16	L-sham	Sham	Left	after	6	22	-4.9	20	Right
16	L-sham	Sham	Left	after	7	23	-6.4	20	Right
16	L-sham	Sham	Left	after	8	24	-2.3	15	Left
17	L-sham	Sham	Left	before	1	1	1.3	20	Left
17	L-sham	Sham	Left	before	2	2	-2	15	Right
17	L-sham	Sham	Left	before	3	3	0.8	15	Right
17	L-sham	Sham	Left	before	4	4	-0.6	20	Left
17	L-sham	Sham	Left	before	5	5	1.9	20	Right
17	L-sham	Sham	Left	before	6	6	-1.1	15	Left
17	L-sham	Sham	Left	before	7	7	1.4	15	Left
17	L-sham	Sham	Left	before	8	8	2.5	20	Right
17	L-sham	Sham	Left	during	1	9	1.5	20	Left
17	L-sham	Sham	Left	during	2	10	-1.1	15	Right
17	L-sham	Sham	Left	during	3	11	0.1	15	Right
17	L-sham	Sham	Left	during	4	12	-0.2	20	Left
17	L-sham	Sham	Left	during	5	13	-2.1	20	Right
17	L-sham	Sham	Left	during	6	14	0.3	15	Left
17	L-sham	Sham	Left	during	7	15	-0.1	15	Left
17	L-sham	Sham	Left	during	8	16	1.5	20	Right
17	L-sham	Sham	Left	after	1	17	-1.5	20	Left
17	L-sham	Sham	Left	after	2	18	2.7	15	Right
17	L-sham	Sham	Left	after	3	19	1.1	15	Right
17	L-sham	Sham	Left	after	4	20	-1.9	20	Left
17	L-sham	Sham	Left	after	5	21	1.3	20	Right
17	L-sham	Sham	Left	after	6	22	-0.6	15	Left
17	L-sham	Sham	Left	after	7	23	-0.5	15	Left
17	L-sham	Sham	Left	after	8	24	0.1	20	Right
18	L-sham	Sham	Left	before	1	1	-3.3	15	Left
18	L-sham	Sham	Left	before	2	2	1.1	20	Right
18	L-sham	Sham	Left	before	3	3	1.1	20	Right
18	L-sham	Sham	Left	before	4	4	1.3	15	Left
18	L-sham	Sham	Left	before	5	5	0.2	15	Right
18	L-sham	Sham	Left	before	6	6	-1.7	20	Left
18	L-sham	Sham	Left	before	7	7	-0.2	20	Left
18	L-sham	Sham	Left	before	8	8	-0.4	15	Right
18	L-sham	Sham	Left	during	1	9	-3.1	15	Left
18	L-sham	Sham	Left	during	2	10	-1.5	20	Right
18	L-sham	Sham	Left	during	3	11	2.4	20	Right
18	L-sham	Sham	Left	during	4	12	0.1	15	Left
18	L-sham	Sham	Left	during	5	13	2.6	15	Right
18	L-sham	Sham	Left	during	6	14	-1.3	20	Left
18	L-sham	Sham	Left	during	7	15	0.1	20	Left
18	L-sham	Sham	Left	during	8	16	0.1	15	Right
18	L-sham	Sham	Left	after	1	17	4.2	15	Left
18	L-sham	Sham	Left	after	2	18	-1.5	20	Right
18	L-sham	Sham	Left	after	3	19	-0.5	20	Right
18	L-sham	Sham	Left	after	4	20	1.2	15	Left
18	L-sham	Sham	Left	after	5	21	-1.4	15	Right
18	L-sham	Sham	Left	after	6	22	-1	20	Left
18	L-sham	Sham	Left	after	7	23	0.1	20	Left
18	L-sham	Sham	Left	after	8	24	0.4	15	Right
19	L-sham	Sham	Left	before	1	1	0.4	15	Right
19	L-sham	Sham	Left	before	2	2	-0.1	20	Left
19	L-sham	Sham	Left	before	3	3	1	20	Left
19	L-sham	Sham	Left	before	4	4	2.9	15	Right
19	L-sham	Sham	Left	before	5	5	0.7	15	Left
19	L-sham	Sham	Left	before	6	6	-1.8	20	Right
19	L-sham	Sham	Left	before	7	7	-0.5	20	Right
19	L-sham	Sham	Left	before	8	8	0.4	15	Left
19	L-sham	Sham	Left	during	1	9	-2.6	15	Right
19	L-sham	Sham	Left	during	2	10	-1	20	Left
19	L-sham	Sham	Left	during	3	11	-0.7	20	Left
19	L-sham	Sham	Left	during	4	12	-1.1	15	Right
19	L-sham	Sham	Left	during	5	13	-2.8	15	Left
19	L-sham	Sham	Left	during	6	14	0.6	20	Right
19	L-sham	Sham	Left	during	7	15	3.4	20	Right
19	L-sham	Sham	Left	during	8	16	-1.5	15	Left
19	L-sham	Sham	Left	after	1	17	0.1	15	Right
19	L-sham	Sham	Left	after	2	18	-1.9	20	Left
19	L-sham	Sham	Left	after	3	19	-0.2	20	Left
19	L-sham	Sham	Left	after	4	20	-2.5	15	Right
19	L-sham	Sham	Left	after	5	21	2.4	15	Left
19	L-sham	Sham	Left	after	6	22	0.9	20	Right
19	L-sham	Sham	Left	after	7	23	-1.3	20	Right
19	L-sham	Sham	Left	after	8	24	1.6	15	Left
20	L-sham	Sham	Left	before	1	1	-3.5	15	Right
20	L-sham	Sham	Left	before	2	2	-0.9	20	Left
20	L-sham	Sham	Left	before	3	3	-0.2	20	Left
20	L-sham	Sham	Left	before	4	4	-2.6	15	Right
20	L-sham	Sham	Left	before	5	5	2	15	Left
20	L-sham	Sham	Left	before	6	6	-1.8	20	Right
20	L-sham	Sham	Left	before	7	7	0.5	20	Right
20	L-sham	Sham	Left	before	8	8	2.5	15	Left
20	L-sham	Sham	Left	during	1	9	3.5	15	Right
20	L-sham	Sham	Left	during	2	10	-2.1	20	Left
20	L-sham	Sham	Left	during	3	11	-3	20	Left
20	L-sham	Sham	Left	during	4	12	6.2	15	Right
20	L-sham	Sham	Left	during	5	13	-6.5	15	Left
20	L-sham	Sham	Left	during	6	14	4.3	20	Right
20	L-sham	Sham	Left	during	7	15	3.3	20	Right
20	L-sham	Sham	Left	during	8	16	-4.6	15	Left
20	L-sham	Sham	Left	after	1	17	2.7	15	Right
20	L-sham	Sham	Left	after	2	18	-3.2	20	Left
20	L-sham	Sham	Left	after	3	19	-2.8	20	Left
20	L-sham	Sham	Left	after	4	20	1.2	15	Right
20	L-sham	Sham	Left	after	5	21	-1	15	Left
20	L-sham	Sham	Left	after	6	22	3.7	20	Right
20	L-sham	Sham	Left	after	7	23	3.8	20	Right
20	L-sham	Sham	Left	after	8	24	0.5	15	Left
21	L-sham	Sham	Left	before	1	1	-5.6	20	Right
21	L-sham	Sham	Left	before	2	2	3.2	15	Left
21	L-sham	Sham	Left	before	3	3	4.5	15	Left
21	L-sham	Sham	Left	before	4	4	-2.1	20	Right
21	L-sham	Sham	Left	before	5	5	2.4	20	Left
21	L-sham	Sham	Left	before	6	6	-5	15	Right
21	L-sham	Sham	Left	before	7	7	-5.7	15	Right
21	L-sham	Sham	Left	before	8	8	1.9	20	Left
21	L-sham	Sham	Left	during	1	9	-6.6	20	Right
21	L-sham	Sham	Left	during	2	10	1.4	15	Left
21	L-sham	Sham	Left	during	3	11	3.7	15	Left
21	L-sham	Sham	Left	during	4	12	-6.9	20	Right
21	L-sham	Sham	Left	during	5	13	3.9	20	Left
21	L-sham	Sham	Left	during	6	14	-2.5	15	Right
21	L-sham	Sham	Left	during	7	15	-0.6	15	Right
21	L-sham	Sham	Left	during	8	16	2.5	20	Left
21	L-sham	Sham	Left	after	1	17	1.4	20	Right
21	L-sham	Sham	Left	after	2	18	-2	15	Left
21	L-sham	Sham	Left	after	3	19	-0.9	15	Left
21	L-sham	Sham	Left	after	4	20	0.1	20	Right
21	L-sham	Sham	Left	after	5	21	-3	20	Left
21	L-sham	Sham	Left	after	6	22	-2.1	15	Right
21	L-sham	Sham	Left	after	7	23	-0.5	15	Right
21	L-sham	Sham	Left	after	8	24	-3.8	20	Left
22	L-sham	Sham	Left	before	1	1	9.2	20	Left
22	L-sham	Sham	Left	before	2	2	-3.2	15	Right
22	L-sham	Sham	Left	before	3	3	-3.2	15	Right
22	L-sham	Sham	Left	before	4	4	7.2	20	Left
22	L-sham	Sham	Left	before	5	5	-2.4	20	Right
22	L-sham	Sham	Left	before	6	6	4.9	15	Left
22	L-sham	Sham	Left	before	7	7	4.6	15	Left
22	L-sham	Sham	Left	before	8	8	-3.4	20	Right
22	L-sham	Sham	Left	during	1	9	-2.1	20	Left
22	L-sham	Sham	Left	during	2	10	5.2	15	Right
22	L-sham	Sham	Left	during	3	11	5	15	Right
22	L-sham	Sham	Left	during	4	12	-3.2	20	Left
22	L-sham	Sham	Left	during	5	13	4.6	20	Right
22	L-sham	Sham	Left	during	6	14	-5.6	15	Left
22	L-sham	Sham	Left	during	7	15	-4.6	15	Left
22	L-sham	Sham	Left	during	8	16	3.4	20	Right
22	L-sham	Sham	Left	after	1	17	3.7	20	Left
22	L-sham	Sham	Left	after	2	18	-3.1	15	Right
22	L-sham	Sham	Left	after	3	19	-2.3	15	Right
22	L-sham	Sham	Left	after	4	20	3	20	Left
22	L-sham	Sham	Left	after	5	21	-4.1	20	Right
22	L-sham	Sham	Left	after	6	22	5	15	Left
22	L-sham	Sham	Left	after	7	23	5.5	15	Left
22	L-sham	Sham	Left	after	8	24	-1.9	20	Right
23	L-sham	Sham	Left	before	1	1	5.4	20	Right
23	L-sham	Sham	Left	before	2	2	-7.4	15	Left
23	L-sham	Sham	Left	before	3	3	-9.4	15	Left
23	L-sham	Sham	Left	before	4	4	7.6	20	Right
23	L-sham	Sham	Left	before	5	5	-8.7	20	Left
23	L-sham	Sham	Left	before	6	6	10	15	Right
23	L-sham	Sham	Left	before	7	7	10.3	15	Right
23	L-sham	Sham	Left	before	8	8	-5.8	20	Left
23	L-sham	Sham	Left	during	1	9	-7.2	20	Right
23	L-sham	Sham	Left	during	2	10	5.4	15	Left
23	L-sham	Sham	Left	during	3	11	5	15	Left
23	L-sham	Sham	Left	during	4	12	-7.5	20	Right
23	L-sham	Sham	Left	during	5	13	7.5	20	Left
23	L-sham	Sham	Left	during	6	14	-4.1	15	Right
23	L-sham	Sham	Left	during	7	15	-3.3	15	Right
23	L-sham	Sham	Left	during	8	16	7.1	20	Left
23	L-sham	Sham	Left	after	1	17	7.6	20	Right
23	L-sham	Sham	Left	after	2	18	-2.7	15	Left
23	L-sham	Sham	Left	after	3	19	-1.9	15	Left
23	L-sham	Sham	Left	after	4	20	5.7	20	Right
23	L-sham	Sham	Left	after	5	21	-4.6	20	Left
23	L-sham	Sham	Left	after	6	22	-5.1	15	Right
23	L-sham	Sham	Left	after	7	23	5.2	15	Right
23	L-sham	Sham	Left	after	8	24	-7.1	20	Left
24	L-sham	Sham	Left	before	1	1	4.2	15	Left
24	L-sham	Sham	Left	before	2	2	-2.8	20	Right
24	L-sham	Sham	Left	before	3	3	-2.1	20	Right
24	L-sham	Sham	Left	before	4	4	6.5	15	Left
24	L-sham	Sham	Left	before	5	5	-4.1	15	Right
24	L-sham	Sham	Left	before	6	6	1.4	20	Left
24	L-sham	Sham	Left	before	7	7	2.4	20	Left
24	L-sham	Sham	Left	before	8	8	-3.6	15	Right
24	L-sham	Sham	Left	during	1	9	-2.8	15	Left
24	L-sham	Sham	Left	during	2	10	-4.9	20	Right
24	L-sham	Sham	Left	during	3	11	-8.4	20	Right
24	L-sham	Sham	Left	during	4	12	2.8	15	Left
24	L-sham	Sham	Left	during	5	13	-3.5	15	Right
24	L-sham	Sham	Left	during	6	14	5.1	20	Left
24	L-sham	Sham	Left	during	7	15	5.9	20	Left
24	L-sham	Sham	Left	during	8	16	-2.2	15	Right
24	L-sham	Sham	Left	after	1	17	-8.8	15	Left
24	L-sham	Sham	Left	after	2	18	1.1	20	Right
24	L-sham	Sham	Left	after	3	19	4.4	20	Right
24	L-sham	Sham	Left	after	4	20	-5.8	15	Left
24	L-sham	Sham	Left	after	5	21	2.3	15	Right
24	L-sham	Sham	Left	after	6	22	-2.8	20	Left
24	L-sham	Sham	Left	after	7	23	-4.9	20	Left
24	L-sham	Sham	Left	after	8	24	5	15	Right
25	R-Vib	NMV	Right	before	1	1	2.4	20	Right
25	R-Vib	NMV	Right	before	2	2	-3.8	15	Left
25	R-Vib	NMV	Right	before	3	3	-4.3	15	Left
25	R-Vib	NMV	Right	before	4	4	1.6	20	Right
25	R-Vib	NMV	Right	before	5	5	-2.4	20	Left
25	R-Vib	NMV	Right	before	6	6	7	15	Right
25	R-Vib	NMV	Right	before	7	7	5.1	15	Right
25	R-Vib	NMV	Right	before	8	8	-0.7	20	Left
25	R-Vib	NMV	Right	during	1	9	1.2	20	Right
25	R-Vib	NMV	Right	during	2	10	-0.3	15	Left
25	R-Vib	NMV	Right	during	3	11	-1	15	Left
25	R-Vib	NMV	Right	during	4	12	0.5	20	Right
25	R-Vib	NMV	Right	during	5	13	-0.2	20	Left
25	R-Vib	NMV	Right	during	6	14	4.2	15	Right
25	R-Vib	NMV	Right	during	7	15	4.6	15	Right
25	R-Vib	NMV	Right	during	8	16	-0.2	20	Left
25	R-Vib	NMV	Right	after	1	17	0.1	20	Right
25	R-Vib	NMV	Right	after	2	18	-1.1	15	Left
25	R-Vib	NMV	Right	after	3	19	-3.2	15	Left
25	R-Vib	NMV	Right	after	4	20	1.2	20	Right
25	R-Vib	NMV	Right	after	5	21	0.1	20	Left
25	R-Vib	NMV	Right	after	6	22	0.5	15	Right
25	R-Vib	NMV	Right	after	7	23	3.1	15	Right
25	R-Vib	NMV	Right	after	8	24	-3.4	20	Left
26	R-Vib	NMV	Right	before	1	1	2.7	20	Right
26	R-Vib	NMV	Right	before	2	2	-1.4	15	Left
26	R-Vib	NMV	Right	before	3	3	-2.4	15	Left
26	R-Vib	NMV	Right	before	4	4	-0.4	20	Right
26	R-Vib	NMV	Right	before	5	5	-1.7	20	Left
26	R-Vib	NMV	Right	before	6	6	3.5	15	Right
26	R-Vib	NMV	Right	before	7	7	-4.5	15	Right
26	R-Vib	NMV	Right	before	8	8	-5.2	20	Left
26	R-Vib	NMV	Right	during	1	9	-2.1	20	Right
26	R-Vib	NMV	Right	during	2	10	0.9	15	Left
26	R-Vib	NMV	Right	during	3	11	-0.1	15	Left
26	R-Vib	NMV	Right	during	4	12	1	20	Right
26	R-Vib	NMV	Right	during	5	13	1	20	Left
26	R-Vib	NMV	Right	during	6	14	-3.9	15	Right
26	R-Vib	NMV	Right	during	7	15	-1.3	15	Right
26	R-Vib	NMV	Right	during	8	16	2.2	20	Left
26	R-Vib	NMV	Right	after	1	17	-0.4	20	Right
26	R-Vib	NMV	Right	after	2	18	3.2	15	Left
26	R-Vib	NMV	Right	after	3	19	0.7	15	Left
26	R-Vib	NMV	Right	after	4	20	-1.5	20	Right
26	R-Vib	NMV	Right	after	5	21	-2.2	20	Left
26	R-Vib	NMV	Right	after	6	22	-3.9	15	Right
26	R-Vib	NMV	Right	after	7	23	-3.4	15	Right
26	R-Vib	NMV	Right	after	8	24	1	20	Left
27	R-Vib	NMV	Right	before	1	1	2.1	15	Left
27	R-Vib	NMV	Right	before	2	2	-1	20	Right
27	R-Vib	NMV	Right	before	3	3	-3.2	20	Right
27	R-Vib	NMV	Right	before	4	4	-1	15	Left
27	R-Vib	NMV	Right	before	5	5	1.1	15	Right
27	R-Vib	NMV	Right	before	6	6	-3.4	20	Left
27	R-Vib	NMV	Right	before	7	7	-2.4	20	Left
27	R-Vib	NMV	Right	before	8	8	2	15	Right
27	R-Vib	NMV	Right	during	1	9	-3	15	Left
27	R-Vib	NMV	Right	during	2	10	0.3	20	Right
27	R-Vib	NMV	Right	during	3	11	1.3	20	Right
27	R-Vib	NMV	Right	during	4	12	-0.2	15	Left
27	R-Vib	NMV	Right	during	5	13	1.1	15	Right
27	R-Vib	NMV	Right	during	6	14	0.8	20	Left
27	R-Vib	NMV	Right	during	7	15	0.1	20	Left
27	R-Vib	NMV	Right	during	8	16	1.7	15	Right
27	R-Vib	NMV	Right	after	1	17	-0.4	15	Left
27	R-Vib	NMV	Right	after	2	18	2.7	20	Right
27	R-Vib	NMV	Right	after	3	19	0.4	20	Right
27	R-Vib	NMV	Right	after	4	20	-1.2	15	Left
27	R-Vib	NMV	Right	after	5	21	1.9	15	Right
27	R-Vib	NMV	Right	after	6	22	0.5	20	Left
27	R-Vib	NMV	Right	after	7	23	-2.5	20	Left
27	R-Vib	NMV	Right	after	8	24	1.3	15	Right
28	R-Vib	NMV	Right	before	1	1	2	15	Right
28	R-Vib	NMV	Right	before	2	2	-1.1	20	Left
28	R-Vib	NMV	Right	before	3	3	-2.5	20	Left
28	R-Vib	NMV	Right	before	4	4	-1.7	15	Right
28	R-Vib	NMV	Right	before	5	5	2.7	15	Left
28	R-Vib	NMV	Right	before	6	6	0.6	20	Right
28	R-Vib	NMV	Right	before	7	7	2.2	20	Right
28	R-Vib	NMV	Right	before	8	8	-3.5	15	Left
28	R-Vib	NMV	Right	during	1	9	-2	15	Right
28	R-Vib	NMV	Right	during	2	10	-0.4	20	Left
28	R-Vib	NMV	Right	during	3	11	-2.3	20	Left
28	R-Vib	NMV	Right	during	4	12	-1.3	15	Right
28	R-Vib	NMV	Right	during	5	13	1	15	Left
28	R-Vib	NMV	Right	during	6	14	1.4	20	Right
28	R-Vib	NMV	Right	during	7	15	0.4	20	Right
28	R-Vib	NMV	Right	during	8	16	2.3	15	Left
28	R-Vib	NMV	Right	after	1	17	-1.4	15	Right
28	R-Vib	NMV	Right	after	2	18	-2.5	20	Left
28	R-Vib	NMV	Right	after	3	19	-3.7	20	Left
28	R-Vib	NMV	Right	after	4	20	-1.9	15	Right
28	R-Vib	NMV	Right	after	5	21	-0.2	15	Left
28	R-Vib	NMV	Right	after	6	22	0.2	20	Right
28	R-Vib	NMV	Right	after	7	23	0.7	20	Right
28	R-Vib	NMV	Right	after	8	24	0.9	15	Left
29	R-Vib	NMV	Right	before	1	1	-3.1	15	Right
29	R-Vib	NMV	Right	before	2	2	4	20	Left
29	R-Vib	NMV	Right	before	3	3	4.7	20	Left
29	R-Vib	NMV	Right	before	4	4	-6.9	15	Right
29	R-Vib	NMV	Right	before	5	5	0.8	15	Left
29	R-Vib	NMV	Right	before	6	6	-4.6	20	Right
29	R-Vib	NMV	Right	before	7	7	-6.5	20	Right
29	R-Vib	NMV	Right	before	8	8	2	15	Left
29	R-Vib	NMV	Right	during	1	9	-5.5	15	Right
29	R-Vib	NMV	Right	during	2	10	5.4	20	Left
29	R-Vib	NMV	Right	during	3	11	5	20	Left
29	R-Vib	NMV	Right	during	4	12	-1.9	15	Right
29	R-Vib	NMV	Right	during	5	13	3.5	15	Left
29	R-Vib	NMV	Right	during	6	14	-5.6	20	Right
29	R-Vib	NMV	Right	during	7	15	-6	20	Right
29	R-Vib	NMV	Right	during	8	16	0.9	15	Left
29	R-Vib	NMV	Right	after	1	17	-4.6	15	Right
29	R-Vib	NMV	Right	after	2	18	6.8	20	Left
29	R-Vib	NMV	Right	after	3	19	6.7	20	Left
29	R-Vib	NMV	Right	after	4	20	-3.1	15	Right
29	R-Vib	NMV	Right	after	5	21	3.8	15	Left
29	R-Vib	NMV	Right	after	6	22	-2.1	20	Right
29	R-Vib	NMV	Right	after	7	23	-6.1	20	Right
29	R-Vib	NMV	Right	after	8	24	2.1	15	Left
30	R-Vib	NMV	Right	before	1	1	5.8	20	Left
30	R-Vib	NMV	Right	before	2	2	-8.7	15	Right
30	R-Vib	NMV	Right	before	3	3	-9.8	15	Right
30	R-Vib	NMV	Right	before	4	4	4.6	20	Left
30	R-Vib	NMV	Right	before	5	5	-5.4	20	Right
30	R-Vib	NMV	Right	before	6	6	7	15	Left
30	R-Vib	NMV	Right	before	7	7	7.3	15	Left
30	R-Vib	NMV	Right	before	8	8	-3	20	Right
30	R-Vib	NMV	Right	during	1	9	3.6	20	Left
30	R-Vib	NMV	Right	during	2	10	-6.4	15	Right
30	R-Vib	NMV	Right	during	3	11	-6.8	15	Right
30	R-Vib	NMV	Right	during	4	12	0.5	20	Left
30	R-Vib	NMV	Right	during	5	13	-1.4	20	Right
30	R-Vib	NMV	Right	during	6	14	5.2	15	Left
30	R-Vib	NMV	Right	during	7	15	2.8	15	Left
30	R-Vib	NMV	Right	during	8	16	-0.4	20	Right
30	R-Vib	NMV	Right	after	1	17	1.2	20	Left
30	R-Vib	NMV	Right	after	2	18	-1.5	15	Right
30	R-Vib	NMV	Right	after	3	19	-6.9	15	Right
30	R-Vib	NMV	Right	after	4	20	1.3	20	Left
30	R-Vib	NMV	Right	after	5	21	-0.2	20	Right
30	R-Vib	NMV	Right	after	6	22	5.1	15	Left
30	R-Vib	NMV	Right	after	7	23	1.2	15	Left
30	R-Vib	NMV	Right	after	8	24	0.8	20	Right
31	R-Vib	NMV	Right	before	1	1	-1.8	20	Left
31	R-Vib	NMV	Right	before	2	2	4.7	15	Right
31	R-Vib	NMV	Right	before	3	3	4	15	Right
31	R-Vib	NMV	Right	before	4	4	2.9	20	Left
31	R-Vib	NMV	Right	before	5	5	4	20	Right
31	R-Vib	NMV	Right	before	6	6	-2.7	15	Left
31	R-Vib	NMV	Right	before	7	7	-2.3	15	Left
31	R-Vib	NMV	Right	before	8	8	-1	20	Right
31	R-Vib	NMV	Right	during	1	9	-1	20	Left
31	R-Vib	NMV	Right	during	2	10	1.6	15	Right
31	R-Vib	NMV	Right	during	3	11	0.4	15	Right
31	R-Vib	NMV	Right	during	4	12	1.3	20	Left
31	R-Vib	NMV	Right	during	5	13	-0.9	20	Right
31	R-Vib	NMV	Right	during	6	14	1.8	15	Left
31	R-Vib	NMV	Right	during	7	15	-0.8	15	Left
31	R-Vib	NMV	Right	during	8	16	-0.2	20	Right
31	R-Vib	NMV	Right	after	1	17	-2	20	Left
31	R-Vib	NMV	Right	after	2	18	3.4	15	Right
31	R-Vib	NMV	Right	after	3	19	3.2	15	Right
31	R-Vib	NMV	Right	after	4	20	2	20	Left
31	R-Vib	NMV	Right	after	5	21	2.3	20	Right
31	R-Vib	NMV	Right	after	6	22	-0.9	15	Left
31	R-Vib	NMV	Right	after	7	23	-1.8	15	Left
31	R-Vib	NMV	Right	after	8	24	-0.5	20	Right
32	R-Vib	NMV	Right	before	1	1	4.2	20	Left
32	R-Vib	NMV	Right	before	2	2	2	15	Right
32	R-Vib	NMV	Right	before	3	3	-2.1	15	Right
32	R-Vib	NMV	Right	before	4	4	0.8	20	Left
32	R-Vib	NMV	Right	before	5	5	-4.3	20	Right
32	R-Vib	NMV	Right	before	6	6	-0.3	15	Left
32	R-Vib	NMV	Right	before	7	7	2	15	Left
32	R-Vib	NMV	Right	before	8	8	-3.1	20	Right
32	R-Vib	NMV	Right	during	1	9	-0.1	20	Left
32	R-Vib	NMV	Right	during	2	10	2.1	15	Right
32	R-Vib	NMV	Right	during	3	11	0.2	15	Right
32	R-Vib	NMV	Right	during	4	12	0.2	20	Left
32	R-Vib	NMV	Right	during	5	13	-2	20	Right
32	R-Vib	NMV	Right	during	6	14	-1	15	Left
32	R-Vib	NMV	Right	during	7	15	0	15	Left
32	R-Vib	NMV	Right	during	8	16	-1.3	20	Right
32	R-Vib	NMV	Right	after	1	17	2.5	20	Left
32	R-Vib	NMV	Right	after	2	18	0.9	15	Right
32	R-Vib	NMV	Right	after	3	19	1.2	15	Right
32	R-Vib	NMV	Right	after	4	20	2	20	Left
32	R-Vib	NMV	Right	after	5	21	-1.9	20	Right
32	R-Vib	NMV	Right	after	6	22	0	15	Left
32	R-Vib	NMV	Right	after	7	23	1.6	15	Left
32	R-Vib	NMV	Right	after	8	24	-0.3	20	Right
33	R-Vib	NMV	Right	before	1	1	-1.4	15	Left
33	R-Vib	NMV	Right	before	2	2	2.6	20	Right
33	R-Vib	NMV	Right	before	3	3	3	20	Right
33	R-Vib	NMV	Right	before	4	4	-2.1	15	Left
33	R-Vib	NMV	Right	before	5	5	1.2	15	Right
33	R-Vib	NMV	Right	before	6	6	-2.2	20	Left
33	R-Vib	NMV	Right	before	7	7	-4	20	Left
33	R-Vib	NMV	Right	before	8	8	3.5	15	Right
33	R-Vib	NMV	Right	during	1	9	-0.7	15	Left
33	R-Vib	NMV	Right	during	2	10	2.1	20	Right
33	R-Vib	NMV	Right	during	3	11	3.8	20	Right
33	R-Vib	NMV	Right	during	4	12	-0.9	15	Left
33	R-Vib	NMV	Right	during	5	13	2	15	Right
33	R-Vib	NMV	Right	during	6	14	-1.6	20	Left
33	R-Vib	NMV	Right	during	7	15	-4.2	20	Left
33	R-Vib	NMV	Right	during	8	16	1.8	15	Right
33	R-Vib	NMV	Right	after	1	17	-1.9	15	Left
33	R-Vib	NMV	Right	after	2	18	2.5	20	Right
33	R-Vib	NMV	Right	after	3	19	2.5	20	Right
33	R-Vib	NMV	Right	after	4	20	-3.6	15	Left
33	R-Vib	NMV	Right	after	5	21	2.7	15	Right
33	R-Vib	NMV	Right	after	6	22	-1.7	20	Left
33	R-Vib	NMV	Right	after	7	23	-2.8	20	Left
33	R-Vib	NMV	Right	after	8	24	3.2	15	Right
34	R-Vib	NMV	Right	before	1	1	4.1	15	Right
34	R-Vib	NMV	Right	before	2	2	-0.6	20	Left
34	R-Vib	NMV	Right	before	3	3	-3.4	20	Left
34	R-Vib	NMV	Right	before	4	4	-1.2	15	Right
34	R-Vib	NMV	Right	before	5	5	-3.1	15	Left
34	R-Vib	NMV	Right	before	6	6	-1.3	20	Right
34	R-Vib	NMV	Right	before	7	7	-1.9	20	Right
34	R-Vib	NMV	Right	before	8	8	-1	15	Left
34	R-Vib	NMV	Right	during	1	9	1.1	15	Right
34	R-Vib	NMV	Right	during	2	10	-0.3	20	Left
34	R-Vib	NMV	Right	during	3	11	0.9	20	Left
34	R-Vib	NMV	Right	during	4	12	-0.3	15	Right
34	R-Vib	NMV	Right	during	5	13	0	15	Left
34	R-Vib	NMV	Right	during	6	14	-1.8	20	Right
34	R-Vib	NMV	Right	during	7	15	-2	20	Right
34	R-Vib	NMV	Right	during	8	16	0.3	15	Left
34	R-Vib	NMV	Right	after	1	17	0.5	15	Right
34	R-Vib	NMV	Right	after	2	18	1.1	20	Left
34	R-Vib	NMV	Right	after	3	19	0.6	20	Left
34	R-Vib	NMV	Right	after	4	20	-0.8	15	Right
34	R-Vib	NMV	Right	after	5	21	1.2	15	Left
34	R-Vib	NMV	Right	after	6	22	-3.5	20	Right
34	R-Vib	NMV	Right	after	7	23	-0.7	20	Right
34	R-Vib	NMV	Right	after	8	24	-0.1	15	Left
35	R-Vib	NMV	Right	before	1	1	2.3	20	Right
35	R-Vib	NMV	Right	before	2	2	-1.3	15	Left
35	R-Vib	NMV	Right	before	3	3	-4.6	15	Left
35	R-Vib	NMV	Right	before	4	4	-1	20	Right
35	R-Vib	NMV	Right	before	5	5	-3.6	20	Left
35	R-Vib	NMV	Right	before	6	6	1.8	15	Right
35	R-Vib	NMV	Right	before	7	7	2.3	15	Right
35	R-Vib	NMV	Right	before	8	8	-2.1	20	Left
35	R-Vib	NMV	Right	during	1	9	0.1	20	Right
35	R-Vib	NMV	Right	during	2	10	-3.3	15	Left
35	R-Vib	NMV	Right	during	3	11	-1.2	15	Left
35	R-Vib	NMV	Right	during	4	12	-3.3	20	Right
35	R-Vib	NMV	Right	during	5	13	-0.6	20	Left
35	R-Vib	NMV	Right	during	6	14	0.2	15	Right
35	R-Vib	NMV	Right	during	7	15	1	15	Right
35	R-Vib	NMV	Right	during	8	16	-1	20	Left
35	R-Vib	NMV	Right	after	1	17	-0.1	20	Right
35	R-Vib	NMV	Right	after	2	18	-1.1	15	Left
35	R-Vib	NMV	Right	after	3	19	-4.1	15	Left
35	R-Vib	NMV	Right	after	4	20	-0.8	20	Right
35	R-Vib	NMV	Right	after	5	21	-1.9	20	Left
35	R-Vib	NMV	Right	after	6	22	0.8	15	Right
35	R-Vib	NMV	Right	after	7	23	0.2	15	Right
35	R-Vib	NMV	Right	after	8	24	-2	20	Left
36	R-Vib	NMV	Right	before	1	1	5.6	15	Left
36	R-Vib	NMV	Right	before	2	2	-3.9	20	Right
36	R-Vib	NMV	Right	before	3	3	-3.2	20	Right
36	R-Vib	NMV	Right	before	4	4	7.2	15	Left
36	R-Vib	NMV	Right	before	5	5	-5.6	15	Right
36	R-Vib	NMV	Right	before	6	6	2.2	20	Left
36	R-Vib	NMV	Right	before	7	7	5.9	20	Left
36	R-Vib	NMV	Right	before	8	8	-8.9	15	Right
36	R-Vib	NMV	Right	during	1	9	4	15	Left
36	R-Vib	NMV	Right	during	2	10	-5	20	Right
36	R-Vib	NMV	Right	during	3	11	-3.7	20	Right
36	R-Vib	NMV	Right	during	4	12	-4.9	15	Left
36	R-Vib	NMV	Right	during	5	13	-4.2	15	Right
36	R-Vib	NMV	Right	during	6	14	2	20	Left
36	R-Vib	NMV	Right	during	7	15	2.4	20	Left
36	R-Vib	NMV	Right	during	8	16	-6	15	Right
36	R-Vib	NMV	Right	after	1	17	3.2	15	Left
36	R-Vib	NMV	Right	after	2	18	-2.1	20	Right
36	R-Vib	NMV	Right	after	3	19	-4.5	20	Right
36	R-Vib	NMV	Right	after	4	20	4.1	15	Left
36	R-Vib	NMV	Right	after	5	21	-1.1	15	Right
36	R-Vib	NMV	Right	after	6	22	4.7	20	Left
36	R-Vib	NMV	Right	after	7	23	2	20	Left
36	R-Vib	NMV	Right	after	8	24	-7.6	15	Right
37	R-sham	Sham	Right	before	1	1	-3.4	15	Left
37	R-sham	Sham	Right	before	2	2	-3.2	20	Right
37	R-sham	Sham	Right	before	3	3	-2.9	20	Right
37	R-sham	Sham	Right	before	4	4	-1.7	15	Left
37	R-sham	Sham	Right	before	5	5	0.5	15	Right
37	R-sham	Sham	Right	before	6	6	3	20	Left
37	R-sham	Sham	Right	before	7	7	0.4	20	Left
37	R-sham	Sham	Right	before	8	8	-0.2	15	Right
37	R-sham	Sham	Right	during	1	9	0.5	15	Left
37	R-sham	Sham	Right	during	2	10	-2.1	20	Right
37	R-sham	Sham	Right	during	3	11	2.5	20	Right
37	R-sham	Sham	Right	during	4	12	2.4	15	Left
37	R-sham	Sham	Right	during	5	13	-4.8	15	Right
37	R-sham	Sham	Right	during	6	14	-2.7	20	Left
37	R-sham	Sham	Right	during	7	15	-1	20	Left
37	R-sham	Sham	Right	during	8	16	0.9	15	Right
37	R-sham	Sham	Right	after	1	17	4	15	Left
37	R-sham	Sham	Right	after	2	18	-1.3	20	Right
37	R-sham	Sham	Right	after	3	19	-3.9	20	Right
37	R-sham	Sham	Right	after	4	20	1.8	15	Left
37	R-sham	Sham	Right	after	5	21	-2.7	15	Right
37	R-sham	Sham	Right	after	6	22	-1.6	20	Left
37	R-sham	Sham	Right	after	7	23	-1	20	Left
37	R-sham	Sham	Right	after	8	24	-1.4	15	Right
38	R-sham	Sham	Right	before	1	1	9.4	15	Right
38	R-sham	Sham	Right	before	2	2	-3.2	20	Left
38	R-sham	Sham	Right	before	3	3	-2.2	20	Left
38	R-sham	Sham	Right	before	4	4	8	15	Right
38	R-sham	Sham	Right	before	5	5	-9.1	15	Left
38	R-sham	Sham	Right	before	6	6	2.9	20	Right
38	R-sham	Sham	Right	before	7	7	1.7	20	Right
38	R-sham	Sham	Right	before	8	8	-3.7	15	Left
38	R-sham	Sham	Right	during	1	9	-7.7	15	Right
38	R-sham	Sham	Right	during	2	10	5.4	20	Left
38	R-sham	Sham	Right	during	3	11	9	20	Left
38	R-sham	Sham	Right	during	4	12	-7.7	15	Right
38	R-sham	Sham	Right	during	5	13	6.6	15	Left
38	R-sham	Sham	Right	during	6	14	-2.6	20	Right
38	R-sham	Sham	Right	during	7	15	-1.5	20	Right
38	R-sham	Sham	Right	during	8	16	7.5	15	Left
38	R-sham	Sham	Right	after	1	17	2.8	15	Right
38	R-sham	Sham	Right	after	2	18	-7.2	20	Left
38	R-sham	Sham	Right	after	3	19	-8.6	20	Left
38	R-sham	Sham	Right	after	4	20	2.4	15	Right
38	R-sham	Sham	Right	after	5	21	-2.2	15	Left
38	R-sham	Sham	Right	after	6	22	5.1	20	Right
38	R-sham	Sham	Right	after	7	23	4.2	20	Right
38	R-sham	Sham	Right	after	8	24	-2.4	15	Left
39	R-sham	Sham	Right	before	1	1	-1.1	20	Left
39	R-sham	Sham	Right	before	2	2	2	15	Right
39	R-sham	Sham	Right	before	3	3	1.6	15	Right
39	R-sham	Sham	Right	before	4	4	-4.5	20	Left
39	R-sham	Sham	Right	before	5	5	1.1	20	Right
39	R-sham	Sham	Right	before	6	6	-6	15	Left
39	R-sham	Sham	Right	before	7	7	-3.1	15	Left
39	R-sham	Sham	Right	before	8	8	1.6	20	Right
39	R-sham	Sham	Right	during	1	9	-0.5	20	Left
39	R-sham	Sham	Right	during	2	10	2.4	15	Right
39	R-sham	Sham	Right	during	3	11	1	15	Right
39	R-sham	Sham	Right	during	4	12	-1.8	20	Left
39	R-sham	Sham	Right	during	5	13	2	20	Right
39	R-sham	Sham	Right	during	6	14	-2	15	Left
39	R-sham	Sham	Right	during	7	15	-1	15	Left
39	R-sham	Sham	Right	during	8	16	3	20	Right
39	R-sham	Sham	Right	after	1	17	-6.6	20	Left
39	R-sham	Sham	Right	after	2	18	0.2	15	Right
39	R-sham	Sham	Right	after	3	19	-1.3	15	Right
39	R-sham	Sham	Right	after	4	20	0.3	20	Left
39	R-sham	Sham	Right	after	5	21	-1.7	20	Right
39	R-sham	Sham	Right	after	6	22	-1.3	15	Left
39	R-sham	Sham	Right	after	7	23	-0.6	15	Left
39	R-sham	Sham	Right	after	8	24	-6.6	20	Right
40	R-sham	Sham	Right	before	1	1	5.6	20	Right
40	R-sham	Sham	Right	before	2	2	-2.7	15	Left
40	R-sham	Sham	Right	before	3	3	-5	15	Left
40	R-sham	Sham	Right	before	4	4	5.2	20	Right
40	R-sham	Sham	Right	before	5	5	-7	20	Left
40	R-sham	Sham	Right	before	6	6	2.6	15	Right
40	R-sham	Sham	Right	before	7	7	4	15	Right
40	R-sham	Sham	Right	before	8	8	-5.3	20	Left
40	R-sham	Sham	Right	during	1	9	-5.8	20	Right
40	R-sham	Sham	Right	during	2	10	2.2	15	Left
40	R-sham	Sham	Right	during	3	11	3.5	15	Left
40	R-sham	Sham	Right	during	4	12	-6.7	20	Right
40	R-sham	Sham	Right	during	5	13	3.8	20	Left
40	R-sham	Sham	Right	during	6	14	-3.5	15	Right
40	R-sham	Sham	Right	during	7	15	-4.1	15	Right
40	R-sham	Sham	Right	during	8	16	1.3	20	Left
40	R-sham	Sham	Right	after	1	17	2	20	Right
40	R-sham	Sham	Right	after	2	18	-6.1	15	Left
40	R-sham	Sham	Right	after	3	19	-5.5	15	Left
40	R-sham	Sham	Right	after	4	20	0.1	20	Right
40	R-sham	Sham	Right	after	5	21	-2	20	Left
40	R-sham	Sham	Right	after	6	22	0.6	15	Right
40	R-sham	Sham	Right	after	7	23	2.5	15	Right
40	R-sham	Sham	Right	after	8	24	-0.7	20	Left
41	R-sham	Sham	Right	before	1	1	-3.2	15	Right
41	R-sham	Sham	Right	before	2	2	1.4	20	Left
41	R-sham	Sham	Right	before	3	3	1.7	20	Left
41	R-sham	Sham	Right	before	4	4	-4.9	15	Right
41	R-sham	Sham	Right	before	5	5	3.8	15	Left
41	R-sham	Sham	Right	before	6	6	-1.9	20	Right
41	R-sham	Sham	Right	before	7	7	-0.1	20	Right
41	R-sham	Sham	Right	before	8	8	2.9	15	Left
41	R-sham	Sham	Right	during	1	9	1	15	Right
41	R-sham	Sham	Right	during	2	10	-5	20	Left
41	R-sham	Sham	Right	during	3	11	-5.9	20	Left
41	R-sham	Sham	Right	during	4	12	-1.1	15	Right
41	R-sham	Sham	Right	during	5	13	-1.4	15	Left
41	R-sham	Sham	Right	during	6	14	1.9	20	Right
41	R-sham	Sham	Right	during	7	15	0.3	20	Right
41	R-sham	Sham	Right	during	8	16	-3.6	15	Left
41	R-sham	Sham	Right	after	1	17	8	15	Right
41	R-sham	Sham	Right	after	2	18	-6.3	20	Left
41	R-sham	Sham	Right	after	3	19	-6.3	20	Left
41	R-sham	Sham	Right	after	4	20	7.3	15	Right
41	R-sham	Sham	Right	after	5	21	-9.1	15	Left
41	R-sham	Sham	Right	after	6	22	3.6	20	Right
41	R-sham	Sham	Right	after	7	23	5.2	20	Right
41	R-sham	Sham	Right	after	8	24	-8	15	Left
42	R-sham	Sham	Right	before	1	1	-6.5	20	Right
42	R-sham	Sham	Right	before	2	2	3.5	15	Left
42	R-sham	Sham	Right	before	3	3	3.3	15	Left
42	R-sham	Sham	Right	before	4	4	-5.8	20	Right
42	R-sham	Sham	Right	before	5	5	2.5	20	Left
42	R-sham	Sham	Right	before	6	6	1.3	15	Right
42	R-sham	Sham	Right	before	7	7	-3.8	15	Right
42	R-sham	Sham	Right	before	8	8	4.2	20	Left
42	R-sham	Sham	Right	during	1	9	3.9	20	Right
42	R-sham	Sham	Right	during	2	10	2	15	Left
42	R-sham	Sham	Right	during	3	11	1.9	15	Left
42	R-sham	Sham	Right	during	4	12	3.4	20	Right
42	R-sham	Sham	Right	during	5	13	0.4	20	Left
42	R-sham	Sham	Right	during	6	14	-1.7	15	Right
42	R-sham	Sham	Right	during	7	15	1.5	15	Right
42	R-sham	Sham	Right	during	8	16	-1.1	20	Left
42	R-sham	Sham	Right	after	1	17	-2.3	20	Right
42	R-sham	Sham	Right	after	2	18	-2.2	15	Left
42	R-sham	Sham	Right	after	3	19	-2.3	15	Left
42	R-sham	Sham	Right	after	4	20	-0.5	20	Right
42	R-sham	Sham	Right	after	5	21	1.6	20	Left
42	R-sham	Sham	Right	after	6	22	-0.6	15	Right
42	R-sham	Sham	Right	after	7	23	2.2	15	Right
42	R-sham	Sham	Right	after	8	24	0.2	20	Left
43	R-sham	Sham	Right	before	1	1	7.6	20	Left
43	R-sham	Sham	Right	before	2	2	-2.7	15	Right
43	R-sham	Sham	Right	before	3	3	-1.9	15	Right
43	R-sham	Sham	Right	before	4	4	5.7	20	Left
43	R-sham	Sham	Right	before	5	5	-4.6	20	Right
43	R-sham	Sham	Right	before	6	6	-5.1	15	Left
43	R-sham	Sham	Right	before	7	7	5.2	15	Left
43	R-sham	Sham	Right	before	8	8	-7.1	20	Right
43	R-sham	Sham	Right	during	1	9	5.4	20	Left
43	R-sham	Sham	Right	during	2	10	-7.4	15	Right
43	R-sham	Sham	Right	during	3	11	-9.4	15	Right
43	R-sham	Sham	Right	during	4	12	7.6	20	Left
43	R-sham	Sham	Right	during	5	13	-8.7	20	Right
43	R-sham	Sham	Right	during	6	14	10	15	Left
43	R-sham	Sham	Right	during	7	15	10.3	15	Left
43	R-sham	Sham	Right	during	8	16	-5.8	20	Right
43	R-sham	Sham	Right	after	1	17	-7.2	20	Left
43	R-sham	Sham	Right	after	2	18	5.4	15	Right
43	R-sham	Sham	Right	after	3	19	5	15	Right
43	R-sham	Sham	Right	after	4	20	-7.5	20	Left
43	R-sham	Sham	Right	after	5	21	7.5	20	Right
43	R-sham	Sham	Right	after	6	22	-4.1	15	Left
43	R-sham	Sham	Right	after	7	23	-3.3	15	Left
43	R-sham	Sham	Right	after	8	24	7.1	20	Right
44	R-sham	Sham	Right	before	1	1	-8.8	20	Right
44	R-sham	Sham	Right	before	2	2	1.1	15	Left
44	R-sham	Sham	Right	before	3	3	4.4	15	Left
44	R-sham	Sham	Right	before	4	4	-5.8	20	Right
44	R-sham	Sham	Right	before	5	5	2.3	20	Left
44	R-sham	Sham	Right	before	6	6	-2.8	15	Right
44	R-sham	Sham	Right	before	7	7	-4.9	15	Right
44	R-sham	Sham	Right	before	8	8	5	20	Left
44	R-sham	Sham	Right	during	1	9	4.2	20	Right
44	R-sham	Sham	Right	during	2	10	-2.8	15	Left
44	R-sham	Sham	Right	during	3	11	-2.1	15	Left
44	R-sham	Sham	Right	during	4	12	6.5	20	Right
44	R-sham	Sham	Right	during	5	13	-4.1	20	Left
44	R-sham	Sham	Right	during	6	14	1.4	15	Right
44	R-sham	Sham	Right	during	7	15	2.4	15	Right
44	R-sham	Sham	Right	during	8	16	-3.6	20	Left
44	R-sham	Sham	Right	after	1	17	-2.8	20	Right
44	R-sham	Sham	Right	after	2	18	-4.9	15	Left
44	R-sham	Sham	Right	after	3	19	-8.4	15	Left
44	R-sham	Sham	Right	after	4	20	2.8	20	Right
44	R-sham	Sham	Right	after	5	21	-3.5	20	Left
44	R-sham	Sham	Right	after	6	22	5.1	15	Right
44	R-sham	Sham	Right	after	7	23	5.9	15	Right
44	R-sham	Sham	Right	after	8	24	-2.2	20	Left
45	R-sham	Sham	Right	before	1	1	1	15	Right
45	R-sham	Sham	Right	before	2	2	2.3	20	Left
45	R-sham	Sham	Right	before	3	3	2.2	20	Left
45	R-sham	Sham	Right	before	4	4	-1.5	15	Right
45	R-sham	Sham	Right	before	5	5	4.9	15	Left
45	R-sham	Sham	Right	before	6	6	-0.2	20	Right
45	R-sham	Sham	Right	before	7	7	0.1	20	Right
45	R-sham	Sham	Right	before	8	8	1.7	15	Left
45	R-sham	Sham	Right	during	1	9	6.9	15	Right
45	R-sham	Sham	Right	during	2	10	-4.5	20	Left
45	R-sham	Sham	Right	during	3	11	-4.2	20	Left
45	R-sham	Sham	Right	during	4	12	7.5	15	Right
45	R-sham	Sham	Right	during	5	13	-6.3	15	Left
45	R-sham	Sham	Right	during	6	14	0.8	20	Right
45	R-sham	Sham	Right	during	7	15	2.5	20	Right
45	R-sham	Sham	Right	during	8	16	-3.4	15	Left
45	R-sham	Sham	Right	after	1	17	3.6	15	Right
45	R-sham	Sham	Right	after	2	18	-0.8	20	Left
45	R-sham	Sham	Right	after	3	19	-1.7	20	Left
45	R-sham	Sham	Right	after	4	20	0.8	15	Right
45	R-sham	Sham	Right	after	5	21	1.5	15	Left
45	R-sham	Sham	Right	after	6	22	2.2	20	Right
45	R-sham	Sham	Right	after	7	23	-1.7	20	Right
45	R-sham	Sham	Right	after	8	24	1.5	15	Left
46	R-sham	Sham	Right	before	1	1	-2.9	15	Left
46	R-sham	Sham	Right	before	2	2	0.8	20	Right
46	R-sham	Sham	Right	before	3	3	-1.2	20	Right
46	R-sham	Sham	Right	before	4	4	-1.4	15	Left
46	R-sham	Sham	Right	before	5	5	-1.9	15	Right
46	R-sham	Sham	Right	before	6	6	2.8	20	Left
46	R-sham	Sham	Right	before	7	7	1.7	20	Left
46	R-sham	Sham	Right	before	8	8	0.8	15	Right
46	R-sham	Sham	Right	during	1	9	2.4	15	Left
46	R-sham	Sham	Right	during	2	10	-2	20	Right
46	R-sham	Sham	Right	during	3	11	-1.7	20	Right
46	R-sham	Sham	Right	during	4	12	-1.6	15	Left
46	R-sham	Sham	Right	during	5	13	-0.5	15	Right
46	R-sham	Sham	Right	during	6	14	-2	20	Left
46	R-sham	Sham	Right	during	7	15	0.8	20	Left
46	R-sham	Sham	Right	during	8	16	-0.4	15	Right
46	R-sham	Sham	Right	after	1	17	2.7	15	Left
46	R-sham	Sham	Right	after	2	18	0.7	20	Right
46	R-sham	Sham	Right	after	3	19	-1.6	20	Right
46	R-sham	Sham	Right	after	4	20	4.5	15	Left
46	R-sham	Sham	Right	after	5	21	-0.4	15	Right
46	R-sham	Sham	Right	after	6	22	0.2	20	Left
46	R-sham	Sham	Right	after	7	23	1.6	20	Left
46	R-sham	Sham	Right	after	8	24	-2.8	15	Right
47	R-sham	Sham	Right	before	1	1	4.2	15	Left
47	R-sham	Sham	Right	before	2	2	-1.5	20	Right
47	R-sham	Sham	Right	before	3	3	-0.5	20	Right
47	R-sham	Sham	Right	before	4	4	1.2	15	Left
47	R-sham	Sham	Right	before	5	5	-1.4	15	Right
47	R-sham	Sham	Right	before	6	6	-1	20	Left
47	R-sham	Sham	Right	before	7	7	0.1	20	Left
47	R-sham	Sham	Right	before	8	8	0.4	15	Right
47	R-sham	Sham	Right	during	1	9	-3.3	15	Left
47	R-sham	Sham	Right	during	2	10	1.1	20	Right
47	R-sham	Sham	Right	during	3	11	1.1	20	Right
47	R-sham	Sham	Right	during	4	12	1.3	15	Left
47	R-sham	Sham	Right	during	5	13	0.2	15	Right
47	R-sham	Sham	Right	during	6	14	-1.7	20	Left
47	R-sham	Sham	Right	during	7	15	-0.2	20	Left
47	R-sham	Sham	Right	during	8	16	-0.4	15	Right
47	R-sham	Sham	Right	after	1	17	-3.1	15	Left
47	R-sham	Sham	Right	after	2	18	-1.5	20	Right
47	R-sham	Sham	Right	after	3	19	2.4	20	Right
47	R-sham	Sham	Right	after	4	20	0.1	15	Left
47	R-sham	Sham	Right	after	5	21	2.6	15	Right
47	R-sham	Sham	Right	after	6	22	-1.3	20	Left
47	R-sham	Sham	Right	after	7	23	0.1	20	Left
47	R-sham	Sham	Right	after	8	24	0.1	15	Right
48	R-sham	Sham	Right	before	1	1	0.1	20	Left
48	R-sham	Sham	Right	before	2	2	-1.9	15	Right
48	R-sham	Sham	Right	before	3	3	-0.2	15	Right
48	R-sham	Sham	Right	before	4	4	-2.5	20	Left
48	R-sham	Sham	Right	before	5	5	2.4	20	Right
48	R-sham	Sham	Right	before	6	6	0.9	15	Left
48	R-sham	Sham	Right	before	7	7	-1.3	15	Left
48	R-sham	Sham	Right	before	8	8	1.6	20	Right
48	R-sham	Sham	Right	during	1	9	0.4	20	Left
48	R-sham	Sham	Right	during	2	10	-0.1	15	Right
48	R-sham	Sham	Right	during	3	11	1	15	Right
48	R-sham	Sham	Right	during	4	12	2.9	20	Left
48	R-sham	Sham	Right	during	5	13	0.7	20	Right
48	R-sham	Sham	Right	during	6	14	-1.8	15	Left
48	R-sham	Sham	Right	during	7	15	-0.5	15	Left
48	R-sham	Sham	Right	during	8	16	0.4	20	Right
48	R-sham	Sham	Right	after	1	17	-2.6	20	Left
48	R-sham	Sham	Right	after	2	18	-1	15	Right
48	R-sham	Sham	Right	after	3	19	-0.7	15	Right
48	R-sham	Sham	Right	after	4	20	-1.1	20	Left
48	R-sham	Sham	Right	after	5	21	-2.8	20	Right
48	R-sham	Sham	Right	after	6	22	0.6	15	Left
48	R-sham	Sham	Right	after	7	23	3.4	15	Left
48	R-sham	Sham	Right	after	8	24	-1.5	20	Right
